# Supplementary material for: Cost-effectiveness of human papillomavirus vaccine in China: a systematic review of modelling studies
Source: PubMed Central journal article supplement — BMJ Open. 2021 Dec 8;11(12):e052682. doi: 10.1136/bmjopen-2021-052682 (PMC8655525; doi:10.1136/bmjopen-2021-052682), 2021-12-08
Supplement: bmjopen-2021-052682.draft_revisions.pdf [file bmjopen-2021-052682.draft_revisions.pdf]

# BMJ Open

BMJ Open is committed to open peer review. As part of this commitment we make the peer review history of every article we publish publicly available.

When an article is published we post the peer reviewers' comments and the authors' responses online. We also post the versions of the paper that were used during peer review. These are the versions that the peer review comments apply to.

The versions of the paper that follow are the versions that were submitted during the peer review process. They are not the versions of record or the final published versions. They should not be cited or distributed as the published version of this manuscript.

BMJ Open is an open access journal and the full, final, typeset and author-corrected version of record of the manuscript is available on our site with no access controls, subscription charges or pay-per-view fees (<http://bmjopen.bmj.com>).

If you have any questions on BMJ Open's open peer review process please email [info.bmjopen@bmj.com](mailto:info.bmjopen@bmj.com)

# BMJ Open

## The cost-effectiveness of human papillomavirus vaccine in China: a systematic review of modeling studies

|                               |                                                                                                                                                                                                                                                                                                                                                                                                                                                                                      |
|-------------------------------|--------------------------------------------------------------------------------------------------------------------------------------------------------------------------------------------------------------------------------------------------------------------------------------------------------------------------------------------------------------------------------------------------------------------------------------------------------------------------------------|
| Journal:                      | <i>BMJ Open</i>                                                                                                                                                                                                                                                                                                                                                                                                                                                                      |
| Manuscript ID                 | bmjopen-2021-052682                                                                                                                                                                                                                                                                                                                                                                                                                                                                  |
| Article Type:                 | Original research                                                                                                                                                                                                                                                                                                                                                                                                                                                                    |
| Date Submitted by the Author: | 23-Apr-2021                                                                                                                                                                                                                                                                                                                                                                                                                                                                          |
| Complete List of Authors:     | Shi, Wenchuan; Nanjing University of Chinese Medicine, School of Health Economics and Management<br>Cheng, Xiaoli; Beijing University of Chinese Medicine, Dongfang Hospital<br>Wang, Haitao; Beijing University of Chinese Medicine Affiliated Chongqing Traditional Chinese Medicine Hospital<br>Zang, Xiao; Brown University School of Public Health, Department of Epidemiology<br>Chen, Tingting; Nanjing University of Chinese Medicine, The First School of Clinical Medicine |
| Keywords:                     | Infection control < INFECTIOUS DISEASES, HEALTH ECONOMICS, Health policy < HEALTH SERVICES ADMINISTRATION & MANAGEMENT, ONCOLOGY                                                                                                                                                                                                                                                                                                                                                     |
|                               |                                                                                                                                                                                                                                                                                                                                                                                                                                                                                      |

SCHOLARONE™  
Manuscripts

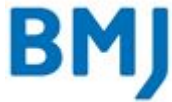

I, the Submitting Author has the right to grant and does grant on behalf of all authors of the Work (as defined in the below author licence), an exclusive licence and/or a non-exclusive licence for contributions from authors who are: i) UK Crown employees; ii) where BMJ has agreed a CC-BY licence shall apply, and/or iii) in accordance with the terms applicable for US Federal Government officers or employees acting as part of their official duties; on a worldwide, perpetual, irrevocable, royalty-free basis to BMJ Publishing Group Ltd ("BMJ") its licensees and where the relevant Journal is co-owned by BMJ to the co-owners of the Journal, to publish the Work in this journal and any other BMJ products and to exploit all rights, as set out in our [licence](#).

The Submitting Author accepts and understands that any supply made under these terms is made by BMJ to the Submitting Author unless you are acting as an employee on behalf of your employer or a postgraduate student of an affiliated institution which is paying any applicable article publishing charge ("APC") for Open Access articles. Where the Submitting Author wishes to make the Work available on an Open Access basis (and intends to pay the relevant APC), the terms of reuse of such Open Access shall be governed by a Creative Commons licence – details of these licences and which [Creative Commons](#) licence will apply to this Work are set out in our licence referred to above.

Other than as permitted in any relevant BMJ Author's Self Archiving Policies, I confirm this Work has not been accepted for publication elsewhere, is not being considered for publication elsewhere and does not duplicate material already published. I confirm all authors consent to publication of this Work and authorise the granting of this licence.

1  
2  
3 **The cost-effectiveness of human papillomavirus vaccine in China: a**  
4 **systematic review of modeling studies**  
5  
6  
7

8 Wenchuan Shi<sup>1</sup>, Xiaoli Cheng<sup>2</sup>, Haitao Wang<sup>3</sup>, Xiao Zang<sup>4</sup>, Tingting Chen<sup>5</sup>  
9  
10

11  
12 1. School of Health Economics and Management, Nanjing University of Chinese  
13 Medicine, Nanjing, Jiangsu, China; 2. Dongfang Hospital, Beijing University of  
14 Chinese Medicine, Beijing, China; 3. Chongqing Traditional Chinese Medicine  
15 Hospital, Chongqing, China; 4. Department of Epidemiology, School of Public  
16 Health, Brown University, Providence, Rhode Island, United States; 5. The First  
17 School of Clinical Medicine, Nanjing University of Chinese Medicine, Nanjing,  
18 Jiangsu, China  
19  
20  
21

22  
23 **Corresponding Author:**  
24

25 Tingting Chen, MD  
26

27 The First School of Clinical Medicine, Nanjing University of Chinese Medicine  
28

29 138 Xianlin Road  
30

31 Nanjing, Jiangsu, China, 210023  
32

33 Phone: (86)25-85811067  
34

35 Fax: (86)25-85811009  
36

37 E-mail: [tingtingchen@njucm.edu.cn](mailto:tingtingchen@njucm.edu.cn)  
38  
39  
40  
41  
42  
43  
44  
45  
46  
47  
48  
49  
50  
51  
52  
53  
54  
55  
56  
57  
58  
59  
60

## Abstract

**Objectives:** China suffers from high burdens of human papillomavirus (HPV) and cervical cancer, whereas the uptake of HPV vaccine remains low. The first Chinese domestic HPV vaccine was released in 2019. However, collective evidence on cost-effectiveness of HPV vaccination in China has yet to be established. We executed a systematic review of published cost-effectiveness studies of HPV vaccine in China.

**Methods:** We searched PubMed, EMBASE, China National Knowledge Infrastructure and Wanfang Data for cost-effectiveness articles published in English and Chinese until January 2021. We extracted information from the selected studies focusing on cost-effectiveness results of various vaccination programs and key contextual and methodological factors influencing cost-effectiveness estimates.

**Results:** A total of 14 studies were included for review. Considerable heterogeneity was found in terms of the methodologies used and HPV vaccination strategies evaluated in different studies. The reviewed studies generally supported the cost-effectiveness of HPV vaccine in China, although some reached alternative conclusions, particularly when assessed incremental to cervical cancer screening. Cost of vaccination was consistently identified as a key determinant for the cost-effectiveness of HPV vaccination programs.

**Conclusions:** Implementing HPV vaccination programs should be complemented with expanded cervical cancer screening, while the release of lower-priced domestic vaccine offers more promising potential for initiating public HPV vaccination programs. Findings of this study contributes important evidence for policies for cervical cancer prevention in China and methodological implications for future modeling efforts.

**Keywords:** human papillomavirus; vaccine; cost-effectiveness; systematic review; cervical cancer

### Strengths and limitations of this study

- The first systematic review on the cost-effectiveness of human papillomavirus (HPV) vaccination strategies in the setting of China.
- A total of 14 modeling studies with disparate methodologies focusing on various HPV vaccination programs and strategies were included for view.
- We performed a review of four databases in both English and Chinese on a comprehensive set of contextual and methodological factors to identify key determinants for cost-effectiveness results and optimal vaccination programs.
- No all aspects and assumptions of a model were evaluated in this review but only the ones we believed were most influential on cost-effectiveness results.

## Introduction

As the leading cause of cervical cancer, human papillomavirus (HPV) is one of the most common sexually transmitted infections both in China and globally.[1] A recent meta-analysis of nearly 200 studies on the prevalence of HPV revealed that as high as 19.0% (95% confidence interval: 17.1%-20.9%) of women in China were infected with high-risk HPVs, while the subtypes with the highest infection rates were 16, 52, 58, 53 and 18.[2] Meanwhile, cervical cancer is the fourth most common cancer for women worldwide, accounting for over 100,000 new cases and 47,000 deaths each year in China.[3] Among all the newly diagnosed cervical cancer cases in China, around 2/3 were found within the age group of 44-64 years.[3] HPV is predominately transmitted through sexual contacts and is also responsible for many other diseases such as anal cancer, oropharyngeal cancer, vaginal and vulvar cancer, penile cancer and genital wart.[4 5]

Cervical cancer is preventable and curable in the early stages. To mobilize efforts to eliminate cervical cancer, the World Health Organization (WHO) has set strategic targets for all countries by 2030, known as the 90-70-90 targets: 90% of girls fully vaccinated by age 15; 70% of women screened twice in a lifetime for cervical cancer (by age 35 and 45); 90% of women identified with cervical disease receive treatment.[6] HPV vaccine has been endorsed as the most effective approach for preventing HPV infection and associated diseases. The United States, Australia, Canada, and the United Kingdom were among the first countries to introduce HPV vaccine into national immunization programs.[7] Population-level impact of HPV vaccine has been evidenced by many prior studies,[8-10] and a

1  
2  
3 recently published study following over 2,000 women from Nordic countries who  
4 have received three doses of quadrivalent HPV vaccine for 14 years demonstrated  
5 a remarkable 100% effectiveness against HPV16/19-related high-grade cervical  
6 dysplasia.[11]  
7  
8  
9

10  
11  
12  
13 It was not until July 2016, a decade after the first HPV vaccine's licensing in the  
14 United States, when the first commercial HPV vaccine, Cervarix, was approved to  
15 use in mainland China.[12] The first Chinese domestic HPV vaccine (Cecolin), a  
16 bivalent vaccine against HPV 16 and 18, was licensed by the Chinese Food and  
17 Drug Administration in Dec 2019 and priced only half of Cervarix.[13] However,  
18 HPV vaccine coverage rate remains low. As of March 2021, there are no HPV  
19 vaccination programs in China. According to an online cross-sectional survey of  
20 4,220 female students from 136 Chinese universities in 2019, only 11% of  
21 participants reported have received HPV vaccine.[14] An even lower HPV  
22 vaccination coverage level (3.6% among females, 1.9% among males) was found  
23 in another online survey of college students in 2019.[15] The low rate of HPV  
24 vaccination is attributable to many causes, including late introduction of HPV  
25 vaccines, high out-of-pocket costs, lack of awareness, and misunderstandings  
26 about HPV and HPV vaccines among the public.[15 16]  
27  
28  
29  
30  
31  
32  
33  
34  
35  
36  
37  
38  
39  
40  
41  
42  
43  
44  
45

46 Cost-effectiveness analysis is widely used to evaluate the public health and  
47 economic value of health interventions and policies. A number of systematic  
48 reviews have assessed cost-effectiveness models evaluating HPV vaccination  
49 programs across different policy settings.[4 17-19] However, none of them have  
50 focused on Chinese context. Although most suggested that HPV vaccination  
51  
52  
53  
54  
55  
56  
57  
58  
59  
60



1  
2  
3 programs were likely to be cost-effective in many settings, some reached  
4  
5 discordant conclusions. Many contextual and methodological factors may affect  
6  
7 the estimated cost-effectiveness of HPV vaccination, such as baseline risk of HPV  
8  
9 infection, uptake of cervical cancer screening and treatment, analytical perspective,  
10  
11 model type, cost of vaccine, vaccine efficacy and duration of protection, and  
12  
13 comparison strategies. Therefore, caution should be taken when interpreting or  
14  
15 extending these study findings and when developing new economic models. Given  
16  
17 the increasing awareness of HPV and availability of HPV vaccines (more options  
18  
19 and lower price) among the public, a targeted review of latest cost-effectiveness  
20  
21 models of HPV vaccination in the setting of China will be of substantial value for  
22  
23 public health policy making. Furthermore, an understanding of the range of  
24  
25 methods and assumptions used in analyzing the cost-effectiveness of HPV  
26  
27 vaccination can help guide future modeling development efforts.  
28  
29  
30  
31

32  
33 We executed a systematic review of published cost-effectiveness studies of HPV  
34  
35 vaccination in China. We comprehensively compared differences in cost-  
36  
37 effectiveness results of various HPV vaccination programs alone, in addition to, or  
38  
39 in combination with other cervical cancer prevention interventions as a result of  
40  
41 various modeling methods, designs and assumptions.  
42  
43  
44  
45  
46  
47  
48  
49  
50  
51  
52  
53  
54  
55  
56  
57  
58  
59  
60

## Methods

### *Search Strategy*

We performed a systematic review of literature published in English and Chinese following the PRISMA guidelines[20] for reporting of systematic reviews (Supplementary Appendix Table S1). The systematic literature search was conducted on January 2, 2021 in databases MEDLINE (PubMed), and EMBASE for articles in English, as well as in databases China National Knowledge Infrastructure (CNKI) and Wanfang Data for articles in Chinese. No review protocol exists for this study. We developed search terms using a combination of the following keywords: 'HPV/cervical cancer', 'vaccine', 'cost-effectiveness' and 'China' (see Supplementary Appendix Table S2, S3 for detailed search strategies). Corresponding terms in Chinese were used in searching Chinese databases. Our searches covered all published literature up to our last search on January 2, 2021 with no limitations on publication date.

### *Selection Criteria*

Cost-effectiveness studies fulfilling the following selection criteria were included in review: (1) studies focusing on HPV vaccination interventions explicitly, alone or in combination with other interventions; (2) studies analyzing the cost-effectiveness of HPV vaccination using a modeling approach, excluding those where costs were not assessed or using a non-modeling approach; (3) studies conducted in the setting of China (including the special administrative regions of Hong Kong and Macau), excluding those examining a broader context where China was a

1  
2  
3 subregion in the analysis; (4) studies published as full-length articles (excluding  
4  
5 conference abstracts and commentaries).  
6  
7

### 8 *Data Extraction and Analysis* 9

10  
11 Information pertaining to the cost-effectiveness results and different contextual and  
12  
13 methodological factors that might influence cost-effectiveness results was  
14  
15 extracted for each selected study. Data extraction was independently performed  
16  
17 by two reviewers and any differences were resolved with a third reviewer. For  
18  
19 articles published in Chinese, data extraction was conducted in the original  
20  
21 language and translated into English for analysis.  
22  
23

24  
25 We converted cost-effectiveness results and unit cost for vaccine from all studies  
26  
27 in different currencies and years to 2021 USD according to the Consumer Price  
28  
29 Index Inflation and USD/CNY exchange rate in January 2021 (1USD=6.5CNY).  
30  
31 For studies where the currency year was not stated, we assumed it to be the year  
32  
33 of a study's publication. We also provided an assessment of the reviewed  
34  
35 economic evaluations using the CHEERS checklist[21] to determine the  
36  
37 percentage of checklist items (a total of 24) that each study met as a score for  
38  
39 quality.  
40  
41  
42  
43

### 44 *Patient and Public Involvement statement* 45

46  
47 Neither patients nor the public were involved in this review.  
48  
49  
50  
51  
52  
53  
54  
55  
56  
57  
58  
59  
60

## Results

Figure 1 presents a flow diagram of the study search and selection process. A total of 136 articles (69 in English and 67 in Chinese) were identified after removing the duplicates (N=78). Following screening of titles and abstracts, 35 full text articles were evaluated, among which 14 met the selection criteria (ten in English and four in Chinese) and were included for review.[13 22-34] Of these 14 included studies, all were published after 2010 and 12 after 2016 (the year when the first HPV vaccine was licensed to use) (Table 1). Most studies evaluated HPV vaccination at the national level (8/14), as opposed to focusing on one province (4/14) or city (2/14). All studies except one (in Hong Kong) were conducted in the setting of mainland China.

### *Study Design*

The majority of studies (13/14) adopted a cohort-based model that stratifies the study population into groups according to each individual's characteristics and health state, whereas only one used an individual-based model (Table 1). In addition to the susceptible and death states, most models considered a similar set of disease states, including different stages of cervical intraepithelial neoplasia/squamous intraepithelial lesion and cervical cancer. Three studies included additional states for HPV infection (stratified by risk level) prior to developing cervical intraepithelial neoplasia, and only two also accounted for genital wart as possible consequence of HPV infection. Although HPV is an infectious disease that is transmitted through sexual contacts, dynamic models that capture changing risk of infection (as a function the number of infectious individuals

1  
2  
3 in the population at a given time point)[35] were only used in 4/14 studies. The  
4  
5 study population simulated in each model were in line with the type of model used,  
6  
7 where population of both males and females were considered all in dynamic  
8  
9 models to construct transmission dynamics and potential herd immunity (other  
10  
11 models considered females only). The majority of models assessed (12/14)  
12  
13 considered a lifetime (or 100-year) time horizon to capture all possible long-term  
14  
15 benefits and consequences of alternative interventions. In estimating relevant  
16  
17 costs, over half studies (7/12) framed their analysis from the perspective of  
18  
19 healthcare sector/payer, two from the perspective of government, and only three  
20  
21 adopted a broader societal perspective, whereas two did not explicitly report their  
22  
23 perspectives. 11/14 studies used utility-based measure for health outcomes, such  
24  
25 as quality-adjusted life years (QALYs) and disability-adjusted life year (DALYs),  
26  
27 while the remaining estimated health benefits in the unit of life year saved or death  
28  
29 averted. A 3% discounting rate was universally applied in all studies (except one  
30  
31 whose discounting rate was unreported). Model calibration and validation are both  
32  
33 recommended by modeling guidelines and are critical steps to establish the  
34  
35 credibility and reliability of economic models against empirical data.[36 37]  
36  
37 However, only nine studies incorporated either calibration or validation (two  
38  
39 performed both) in their analysis.  
40  
41  
42  
43  
44  
45

### 46 47 *HPV Vaccine*

48  
49  
50 The type of HPV vaccine modeled and pertaining features and assumptions varied  
51  
52 across different studies (Table 2). All studies focused on the vaccination of females  
53  
54 only. While in most studies (12/14) vaccination was considered to be implemented  
55  
56  
57  
58  
59  
60

1  
2  
3 among preadolescent girls under age 18 (before sexual debut); two studies  
4 focused on vaccination at the age of 18-25, one examined HPV vaccination at  
5 different ages between 12-55, and one also considered expanded catch-up  
6 programs among females aged 16-39 (the primary program still focused on  
7 preadolescent girls). Different types of vaccine were considered in different studies:  
8 eight studies focused on a bivalent vaccine, one on a quadrivalent vaccine, one on  
9 a nonavalent vaccine, two compared all these three types in one study, while two  
10 did not specify the valence of vaccine. Three-dose schedule was considered in  
11 nine studies; the remaining either assumed a two-dose schedule or did not report  
12 required doses. Although most models derived estimates for vaccine efficacy  
13 against cervical cancer and other HPV-related disease states from real-world data  
14 (clinical trials or observational studies), a few studies (5/14) assumed a 100%  
15 vaccine efficacy, which might result in possible overestimation for the impact and  
16 cost-effectiveness of HPV vaccine. Regarding vaccination coverage for the  
17 modeled interventions, half studies assumed a 70% coverage in their primary  
18 analysis (which may vary in sensitivity analysis), following by a coverage level of  
19 100% (3/14), 80% (1/14), 50% (1/14) and 20% (1/14), while one aimed to explore  
20 different coverage levels (25%, 50%, 75%). Most studies (13/14) assumed lifelong  
21 vaccine protection (in which one also explored other durations of protection) while  
22 only one considered a waning of immunity over time. Cost of vaccination, including  
23 medical cost for multiple doses and relevant administration cost, varied between  
24 studies on different types of vaccine ranging from US\$54.2 to US\$663. Most (8/14)

1  
2  
3 chose a cost between US\$300-500. The first domestic vaccine was analyzed in  
4  
5 Zou et al.[13] study that was priced at US\$99.8 per vaccination (in 2019 USD).  
6  
7

### 8 *Cost-effectiveness of HPV Vaccination Strategies*

9

10  
11 Despite no established cost-effectiveness threshold in China, almost all studies  
12  
13 used the heuristic cost-effectiveness threshold proposed by the WHO based on  
14  
15 local gross domestic product (GDP) per capita, even though two studies did not  
16  
17 use a utility-based measure for health outcomes (Table 3). The only exception was  
18  
19 one that used an extended cost-effectiveness framework whose primary outcome  
20  
21 was not incremental cost-effectiveness ratio (and thus did not specify the  
22  
23 threshold). Various HPV vaccination strategies were assessed in the reviewed  
24  
25 studies. Eight studies examined the impact and cost-effectiveness of HPV  
26  
27 vaccination programs incremental to either existing screening programs or  
28  
29 opportunistic vaccination programs or none at all, among which three stratified  
30  
31 their analysis by different vaccination coverage levels, different ages of vaccination,  
32  
33 and different income levels of target population. Although these eight studies  
34  
35 sought to address slightly different study questions, they appeared to reach a  
36  
37 consistent conclusion that HPV vaccination was cost-effective. One study  
38  
39 examining the effect of vaccination age showed that vaccination was cost-effective  
40  
41 at any age under 23 years in rural and any age under 25 years in urban areas.  
42  
43 One study compared the value of nonavalent vaccine to quadrivalent and bivalent  
44  
45 vaccine for the prevention of cervical cancer and found it not cost-effective unless  
46  
47 the nonavalent vaccine could be priced lower than US\$550 and US\$450 for the  
48  
49 full doses (as opposed to US\$663 used in the study, in 2017 USD), respectively.  
50  
51  
52  
53  
54  
55  
56  
57  
58  
59  
60

1  
2  
3 The other five studies, on the other hand, analyzed combination strategies for HPV  
4 vaccination with various HPV screening methods or frequencies, three of which  
5 also created cost-effective frontiers to identify an optimal strategy. However,  
6 findings of these studies were less consistent, and sometimes contradictory.  
7  
8 Canfell et al. study examined the association between cost-effectiveness of HPV  
9 vaccination strategies (in combination with screening interventions) and cost per  
10 vaccinated girl (CGV), and found strategies involving vaccination would be cost-  
11 effective only at CVGs of US\$50–54 or less (if  $CVG > US\$54$ , screening-only  
12 strategies would be more cost-effective).[22] Ma et al. study found that the addition  
13 of universal vaccination to screening programs was not cost-effective unless with  
14 at least a 50% reduction on the vaccine price (from US\$451 to US\$226).[29] The  
15 optimal combination of vaccine type and screening method identified in Mo et al.  
16 study was nonavalent vaccination and visual inspection with acetic acid (VIA).[30]  
17 However, another finding of this study was that quadrivalent and nonavalent  
18 vaccine both denominated bivalent vaccine regarding the cost-effectiveness,  
19 conversely to Jiang et al.'s results.[24] Although Song et al. showed that the  
20 combination of vaccination at age 15 and screening twice in a lifetime (at age 35  
21 and 45) was cost-effective compared to no intervention, but it was not cost-  
22 effective when compared to only screening twice in a lifetime (optimal strategy).[32]  
23  
24 Zou et al. was the only study that included the domestic vaccine in their analysis  
25 (with lower price than the imported vaccines) and they identified the optimal  
26 strategy to be vaccination with careHPV screening once every five years.[13] They  
27 also determined that adding vaccination to screening programs would be  
28  
29  
30  
31  
32  
33  
34  
35  
36  
37  
38  
39  
40  
41  
42  
43  
44  
45  
46  
47  
48  
49  
50  
51  
52  
53  
54  
55  
56  
57  
58  
59  
60



1  
2  
3 consistently more cost-effective than screening alone when vaccination cost could  
4  
5 be lower than US\$50.  
6  
7

### 8 *Uncertainty Analysis and Study Quality* 9

10  
11 To assess model uncertainty, many studies explicitly incorporated sensitivity  
12  
13 analysis (SA), including one-way SA (in ten studies), two-way SA (in one study),  
14  
15 and probabilistic SA (in five studies) (Table 3, some studies incorporated multiple  
16  
17 types of SA). Among those performed one-way SA, the parameters that cost-  
18  
19 effectiveness results were most sensitive to included discounting rate, cost of  
20  
21 vaccine, and vaccine efficacy. Quality assessment of the reviewed studies against  
22  
23 the CHEERS checklist suggested that most of them upheld a high level of quality  
24  
25 in reporting, with an average score of 85 and ranging from 46 to 100 (where 100  
26  
27 represented 100% of checklist items were complied with) (Supplementary  
28  
29 Appendix Table S4).  
30  
31  
32  
33  
34  
35  
36  
37  
38  
39  
40  
41  
42  
43  
44  
45  
46  
47  
48  
49  
50  
51  
52  
53  
54  
55  
56  
57  
58  
59  
60

## Discussion

To our knowledge, this study provides the first systematic review on the cost-effectiveness of introducing HPV vaccination programs in the setting of China. In this review, we performed a comprehensive and in-depth assessment of 14 model-based cost-effectiveness studies regarding their findings, study design, and assumptions for HPV vaccine and vaccination programs. Despite considerable heterogeneity in the methodologies used in different models, our findings show that HPV vaccination is estimated to have substantial potential to be a cost-effective addition to existing/other cervical cancer prevention interventions in China. However, the cost-effectiveness of HPV vaccination is likely to depend on considerations such as cost of vaccination, age of vaccination, vaccine efficacy, as well as complementary and/or competing strategies (e.g., cervical cancer screening).

Among all the influential factors, cost of vaccine was consistently identified as a key determinant for the cost-effectiveness of HPV vaccination. Cost estimates varied considerably across studies for different vaccines and years; acquiring more reliable evidence on vaccine cost will help reduce uncertainty surrounding cost-effectiveness results. Six of the reviewed studies performed additional threshold analysis to determine the cost at which adding HPV vaccination to cervical cancer screening programs would become/remain (more) cost-effective. While three studies suggested disparate thresholds for the cost per fully vaccinated girl/woman ranging from US\$226-US\$689, findings of the other three were more consistent showing a lower threshold of US\$50. The Zou et al. study assessed the first

1  
2  
3 domestic bivalent HPV vaccine at a unit cost of US\$99.8, substantially cheaper  
4 than the imported vaccines.[13] Given more domestic vaccines under  
5 development and growing initiatives to include HPV vaccine into national  
6 immunization program, further reduction in HPV vaccine price was expected in the  
7 foreseeable future.  
8  
9  
10  
11  
12  
13

14  
15 Findings of the reviewed studies were generally consistent with other systematic  
16 reviews focusing on cost-effectiveness of HPV vaccination in low- and middle-  
17 income countries.[19 38 39] Most of these studies concluded that vaccination was  
18 likely to be cost-effective, particularly in contexts without organized cervical cancer  
19 screening programs. Based on the summary of evidence, a few recommendations  
20 may be provided for implementing HPV vaccination programs to enhance its cost-  
21 effectiveness. HPV vaccine is most recommended for routine vaccination for girls  
22 at younger age (before 16) while will still remain valuable for women of older age  
23 (under 23 years in rural and under 25 years in urban areas) according to one  
24 reviewed study that explored different vaccination ages.[26] The US Centers for  
25 Disease Control and Prevention recommended vaccination for everyone (including  
26 men) at age 11 through age 26 years.[40] In the United Kingdom, men and women  
27 aged 12 to 13 years are routinely offered HPV vaccination and can access free  
28 vaccination up until their 25<sup>th</sup> birthday.[41] Regarding the type of vaccine for  
29 recommendation, two studies reached contradicting conclusions about the relative  
30 cost-effectiveness between nonavalent, quadrivalent and bivalent vaccines. This  
31 difference is likely attributable to disparate costs applied for different vaccines in  
32 the two models. In Jiang et al.'s model,[24] nonavalent vaccine was assumed to  
33  
34  
35  
36  
37  
38  
39  
40  
41  
42  
43  
44  
45  
46  
47  
48  
49  
50  
51  
52  
53  
54  
55  
56  
57  
58  
59  
60

1  
2  
3 be 60% and 116% more expensive than quadrivalent and bivalent vaccines,  
4  
5 respectively, while it costed only 11% more than the other two vaccines in Mo et  
6  
7 al.'s study.[30] Future investigations of different vaccines and their pricing, efficacy  
8  
9 and population impacts may be required for more rigorous recommendation  
10  
11 strategies. Meanwhile, the reviewed studies demonstrated strong synergies  
12  
13 between HPV vaccination and cervical cancer screening that the greatest public  
14  
15 health benefits, and sometimes also the optimal strategy, could be achieved only  
16  
17 when these two interventions were implemented simultaneously. However, in  
18  
19 identifying the optimal combination strategies, two studies indicated that screening  
20  
21 alone might outperform strategies with the addition of HPV vaccination, while there  
22  
23 was less consistency regarding the screening methods (pap, VIA or careHPV test)  
24  
25 and testing frequencies. Given current low uptake of screening in China,  
26  
27 establishing appropriate strategies to substantially expand cervical cancer  
28  
29 screening should be prioritized prior to or simultaneously with implementing HPV  
30  
31 vaccination programs.  
32  
33  
34  
35  
36  
37

38 From the methodological point of view, a few recommended model design and  
39  
40 practice may be highlighted for future modeling efforts. First, a key finding of this  
41  
42 review was that the majority of reviewed studies applied a static model in  
43  
44 simulating HPV infection that was unable to capture potential herd immunity when  
45  
46 HPV vaccination reached a high level of coverage. According to the modeling  
47  
48 guideline, dynamic design is important to consider when an intervention affects a  
49  
50 pathogen's ecology or when the intervention affects disease transmission.[35]  
51  
52 Incorporating dynamic design will ensure capturing the indirect effects of HPV  
53  
54  
55  
56  
57  
58  
59  
60

1  
2  
3 vaccination that arise from averted infections, i.e., individuals not reached by the  
4  
5 vaccination program can still benefit by experiencing a lower infection risk.  
6  
7 However, applying such a dynamic model may require modeling the population of  
8  
9 men (who are non-recipients of HPV vaccine) as well as additional model  
10  
11 parameters. Second, cost-effectiveness models are built upon various input data  
12  
13 and assumptions and are inevitably subject to uncertainty. Handling model  
14  
15 uncertainty is important and can help assess the robustness of model results and  
16  
17 enhance our confidence in a chosen course of action. Model calibration and SA  
18  
19 are both recommended practices[36] to address uncertainty but were not  
20  
21 performed in all models (calibration in 7/14 models, sensitivity analysis in 12/14  
22  
23 models). For the conduct of uncertainty analysis, we also recommend carefully  
24  
25 choosing uncertainty ranges for parameters to meaningfully reflect their plausible  
26  
27 values (rather than imposing an arbitrarily range) and explicitly reporting the  
28  
29 rationale. Third, although cervical cancer is the primary disease following HPV  
30  
31 infection, it is also important to account for other possible consequences and  
32  
33 diseases, without which the impact and cost-effectiveness of HPV vaccination may  
34  
35 be underestimated.  
36  
37  
38  
39  
40  
41  
42

43 Our review may have some limitations. First, we did not attempt to exhaustively  
44  
45 include all aspects and assumptions of a model in this review (such as utility  
46  
47 estimates, force of infection, disease progression) but only the ones we believed  
48  
49 were most influential on cost-effectiveness results. Second, the quality of evidence  
50  
51 used to support a model is another central factor in ensuring credibility and  
52  
53 reliability of model inferences but was not assessed in this review. Third, we were  
54  
55  
56  
57  
58  
59  
60

1  
2  
3 unable to perform a meta-analysis due to the variability across studies in the  
4 strategies evaluated and outcomes reported. Nevertheless, all studies have  
5 compared the estimated cost-effectiveness with the WHO-CHOICE cost-  
6 effectiveness benchmark using local (national, provincial, or city-level) GDP per  
7 capita, providing a consistent criterion across studies.  
8  
9

10  
11  
12 The body of evidence from this systematic review of cost-effectiveness modeling  
13 studies on HPV vaccine suggests that implementing HPV vaccination programs  
14 for young girls is likely warranted in China and should be paired with expansion of  
15 cervical cancer screening to maximize their impact. Cost of vaccination was found  
16 to significantly affect the cost-effectiveness estimates and policy recommendations.  
17  
18 As domestic vaccines become available and their prices continue to drop, HPV  
19 vaccination will become a more viable option in designing cervical cancer  
20 prevention programs. Future modeling studies following established best-practice  
21 standards are needed to reduce decision uncertainty and definitively establish the  
22 cost-effectiveness of HPV vaccination in combination with screening programs.  
23  
24  
25  
26  
27  
28  
29  
30  
31  
32  
33  
34  
35  
36  
37  
38  
39  
40  
41  
42  
43  
44  
45  
46  
47  
48  
49  
50  
51  
52  
53  
54  
55  
56  
57  
58  
59  
60

## Contributors

WS and TC conceptualized the study. WS, XC conducted data collection. WS, HW and XZ performed data analyses. WS and TC wrote the first draft of the article. XC, HW and XZ helped to interpret results and critically revise the manuscript. All authors approved the final draft.

## Funding

This work was supported by the State Administration of Traditional Chinese Medicine of the People's Republic of China (grant number: GZY-GCS-2017-36). The funder had no role in study design, data analysis, or decision to publish.

## Competing interests

The authors have no conflicts of interest to declare.

## Data sharing statement

There is no additional unpublished data associated with this study. All data are available in the manuscript and supplementary appendix.

## References

1. Zhu B, Liu Y, Zuo T, et al. The prevalence, trends, and geographical distribution of human papillomavirus infection in China: The pooled analysis of 1.7 million women. *Cancer medicine* 2019;**8**(11):5373-85
2. Li K, Li Q, Song L, et al. The distribution and prevalence of human papillomavirus in women in mainland China. *Cancer* 2019;**125**(7):1030-37
3. Bruni L, Albero G, Serrano B, et al. ICO/IARC Information Centre on HPV and Cancer (HPV Information Centre). Human Papillomavirus and Related Diseases in China. Summary Report 17 June 2019. Secondary ICO/IARC Information Centre on HPV and Cancer (HPV Information Centre). Human Papillomavirus and Related Diseases in China. Summary Report 17 June 2019 2019. <https://hpcvcentre.net/statistics/reports/CHN.pdf>.
4. Gervais F, Dunton K, Jiang Y, et al. Systematic review of cost-effectiveness analyses for combinations of prevention strategies against human papillomavirus (HPV) infection: a general trend. *BMC public health* 2017;**17**(1):1-18
5. Bansal A, Singh MP, Rai B. Human papillomavirus-associated cancers: A growing global problem. *International Journal of Applied and Basic Medical Research* 2016;**6**(2):84
6. World Health Organization. Global strategy to accelerate the elimination of cervical cancer as a public health problem. Geneva: World Health Organization. Secondary Global strategy to accelerate the elimination of cervical cancer as a public health problem. Geneva: World Health Organization 2020. <https://www.who.int/publications/i/item/9789240014107>.
7. Markowitz LE, Tsu V, Deeks SL, et al. Human papillomavirus vaccine introduction—the first five years. *Vaccine* 2012;**30**:F139-F48
8. Mix JM, Van Dyne EA, Saraiya M, et al. Assessing Impact of HPV Vaccination on Cervical Cancer Incidence among Women Aged 15–29 Years in the United States, 1999–2017: An Ecologic Study. *Cancer Epidemiology and Prevention Biomarkers* 2021;**30**(1):30-37
9. Steben M, Thompson MT, Rodier C, et al. A review of the impact and effectiveness of the quadrivalent human papillomavirus vaccine: 10 years of clinical experience in Canada. *Journal of Obstetrics and Gynaecology Canada* 2018;**40**(12):1635-45
10. Leval A, Herweijer E, Ploner A, et al. Quadrivalent human papillomavirus vaccine effectiveness: a Swedish national cohort study. *Journal of the National Cancer Institute* 2013;**105**(7):469-74
11. Kjaer SK, Nygård M, Sundström K, et al. Final analysis of a 14-year long-term follow-up study of the effectiveness and immunogenicity of the quadrivalent human papillomavirus vaccine in women from four Nordic countries. *EClinicalMedicine* 2020;**23**:100401
12. Chen R, Wong E. The feasibility of universal HPV vaccination program in Shenzhen of China: a health policy analysis. *BMC public health* 2019;**19**(1):1-10
13. Zou Z, Fairley CK, Ong JJ, et al. Domestic HPV vaccine price and economic returns for cervical cancer prevention in China: a cost-effectiveness analysis. *The Lancet Global Health* 2020;**8**(10):e1335-e44
14. You D, Han L, Li L, et al. Human papillomavirus (HPV) vaccine uptake and the willingness to receive the HPV vaccination among female college students in China: a multicenter study. *Vaccines* 2020;**8**(1):31
15. Deng C, Chen X, Liu Y. Human papillomavirus vaccination: coverage rate, knowledge, acceptance, and associated factors in college students in mainland China. *Human Vaccines & Immunotherapeutics* 2020:1-8



16. Ji M, Huang Z, Ren J, et al. Chinese Vaccine Providers' Perspectives on the HPV Vaccine. *Global pediatric health* 2020;**7**:2333794X20967592
17. Seto K, Marra F, Raymakers A, et al. The cost effectiveness of human papillomavirus vaccines. *Drugs* 2012;**72**(5):715-43
18. Pink J, Parker B, Petrou S. Cost effectiveness of HPV vaccination: a systematic review of modelling approaches. *Pharmacoeconomics* 2016;**34**(9):847-61
19. Fesenfeld M, Hutubessy R, Jit M. Cost-effectiveness of human papillomavirus vaccination in low and middle income countries: a systematic review. *Vaccine* 2013;**31**(37):3786-804
20. Moher D, Liberati A, Tetzlaff J, et al. Preferred reporting items for systematic reviews and meta-analyses: the PRISMA statement. *Int J Surg* 2010;**8**(5):336-41
21. Husereau D, Drummond M, Petrou S, et al. Consolidated health economic evaluation reporting standards (CHEERS)—explanation and elaboration: a report of the ISPOR health economic evaluation publication guidelines good reporting practices task force. *Value in health* 2013;**16**(2):231-50
22. Canfell K, Shi J-F, Lew J-B, et al. Prevention of cervical cancer in rural China: evaluation of HPV vaccination and primary HPV screening strategies. *Vaccine* 2011;**29**(13):2487-94
23. Choi HC, Jit M, Leung GM, et al. Simultaneously characterizing the comparative economics of routine female adolescent nonavalent human papillomavirus (HPV) vaccination and assortativity of sexual mixing in Hong Kong Chinese: a modeling analysis. *BMC medicine* 2018;**16**(1):1-13
24. Jiang Y, Ni W, Wu J. Cost-effectiveness and value-based prices of the 9-valent human papillomavirus vaccine for the prevention of cervical cancer in China: an economic modelling analysis. *BMJ open* 2019;**9**(11):e031186
25. Levin CE, Sharma M, Olson Z, et al. An extended cost-effectiveness analysis of publicly financed HPV vaccination to prevent cervical cancer in China. *Vaccine* 2015;**33**(24):2830-41
26. Liu Y-J, Zhang Q, Hu S-Y, et al. Effect of vaccination age on cost-effectiveness of human papillomavirus vaccination against cervical cancer in China. *BMC cancer* 2016;**16**(1):1-11
27. Luo P, Zhang C, Liy D. Rapid evaluation of health economics of bivalent HPV vaccination in Wuhan based on prime tool. *China Pharmacist* 2020;**23**(6):1115-8
28. Luo Y, He H, Tang X, et al. Cost-effectiveness of 2-dose human papillomavirus vaccination for 12-year-old girls in Zhejiang Province: implications for China's expanded program on immunization. *Human vaccines & immunotherapeutics* 2020;**16**(7):1623-29
29. Ma X, Harripersaud K, Smith K, et al. Modeling the epidemiological impact and cost-effectiveness of a combined schoolgirl HPV vaccination and cervical cancer screening program among Chinese women. *Human Vaccines & Immunotherapeutics* 2020:1-10
30. Mo X, Tobe RG, Wang L, et al. Cost-effectiveness analysis of different types of human papillomavirus vaccination combined with a cervical cancer screening program in mainland China. *BMC infectious diseases* 2017;**17**(1):1-12
31. Qie S. Pharmacoeconomic evaluation of cervical cancer vaccine in the prevention of cervical cancer in Chinese women aged 18-25. *Journal of Clinical Medical* 2017;**4**(48):9342-5
32. Song X, Zhao Q, Zhou Z, et al. Health economic evaluation of bivalent human papilloma virus vaccine in China: based on the dynamic model. *Zhonghua yu Fang yi xue za zhi [Chinese Journal of Preventive Medicine]* 2017;**51**(9):814-20

- 1  
2  
3  
4  
5  
6  
7  
8  
9  
10  
11  
12  
13  
14  
15  
16  
17  
18  
19  
20  
21  
22  
23  
24  
25  
26  
27  
28  
29  
30  
31  
32  
33  
34  
35  
36  
37  
38  
39  
40  
41  
42  
43  
44  
45  
46  
47  
48  
49  
50  
51  
52  
53  
54  
55  
56  
57  
58  
59  
60
33. Sun Y, Liu Y, Liu T. Economic evaluation of human papillomavirus vaccine versus Chinese women aged 18 to 25 for treating cervical cancer. *Chinese Journal of Evidence-Based Medicine* 2017;**17**(1):102-7
  34. Zhang Q, Liu Y-J, Hu S-Y, et al. Estimating long-term clinical effectiveness and cost-effectiveness of HPV 16/18 vaccine in China. *BMC cancer* 2016;**16**(1):1-12
  35. Pitman R, Fisman D, Zaric GS, et al. Dynamic transmission modeling: a report of the ISPOR-SMDM Modeling Good Research Practices Task Force Working Group–5. *Medical decision making* 2012;**32**(5):712-21
  36. Briggs AH, Weinstein MC, Fenwick EA, et al. Model parameter estimation and uncertainty: a report of the ISPOR-SMDM Modeling Good Research Practices Task Force--6. *Value in health : the journal of the International Society for Pharmacoeconomics and Outcomes Research* 2012;**15**(6):835-42 doi: 10.1016/j.jval.2012.04.014[published Online First: Epub Date]].
  37. Eddy DM, Hollingworth W, Caro JJ, et al. Model transparency and validation: a report of the ISPOR-SMDM Modeling Good Research Practices Task Force--7. *Value in health : the journal of the International Society for Pharmacoeconomics and Outcomes Research* 2012;**15**(6):843-50 doi: 10.1016/j.jval.2012.04.012[published Online First: Epub Date]].
  38. Silas OA, Achenbach CJ, Murphy RL, et al. Cost effectiveness of human papilloma virus vaccination in low and middle income countries: a systematic review of literature. *Expert review of vaccines* 2018;**17**(1):91-98
  39. Okeah BO, Ridyard CH. Factors influencing the cost-effectiveness outcomes of HPV vaccination and screening interventions in low-to-middle-income countries (LMICs): a systematic review. *Applied health economics and health policy* 2020;**18**:641-54
  40. Meites E, Szilagyi PG, Chesson HW, et al. Human papillomavirus vaccination for adults: updated recommendations of the Advisory Committee on Immunization Practices: Wiley Online Library, 2019.
  41. Government of Canada. Overview of national data on opioid-related harms and deaths. <https://www.canada.ca/en/health-canada/services/substance-use/problematic-prescription-drug-use/opioids/data-surveillance-research/harms-deaths.html>. Accessed January 15, 2019. Government of Canada, 2018

1  
2  
3  
4  
5  
6  
7  
8  
9  
10  
11  
12  
13  
14  
15  
16  
17  
18  
19  
20  
21  
22  
23  
24  
25  
26  
27  
28  
29  
30  
31  
32  
33  
34  
35  
36  
37  
38  
39  
40  
41  
42  
43  
44  
45  
46  
47  
48  
49  
50  
51  
52  
53  
54  
55  
56  
57  
58  
59  
60

**Figure 1. Flow diagram of study selection**  
**Legend:** CEA: cost-effectiveness analysis

For peer review only

**Table 1. Study design of selected modeling studies**

| Reference | Year of publication | Setting                 | Model type                                                         | Disease states modelled                                                       | Study population              | Timeframe | Perspective       | Discount rate | Health measure  | Calibration /validation | Year of cost |
|-----------|---------------------|-------------------------|--------------------------------------------------------------------|-------------------------------------------------------------------------------|-------------------------------|-----------|-------------------|---------------|-----------------|-------------------------|--------------|
| Canfell   | 2011                | Shanxi Province (rural) | Cohort, Dynamic                                                    | CIN (3), cervical cancer                                                      | Males + females (of all ages) | Lifetime  | Societal          | 3%            | Life year       | Calibration             | 2010         |
| Choi      | 2018                | Hong Kong               | Cohort dynamic (for transmission) + individual-based (for disease) | CIN (3)<br>Cervical cancer: 4 stages+ asymptomatic/symptomatic                | Males + females (10-85 years) | Lifetime  | Societal          | 3%            | Life year, QALY | Calibration             | 2018*        |
| Jiang     | 2019                | China                   | Cohort, Static                                                     | Cervical cancer                                                               | Females of 16 years           | Lifetime  | Healthcare payer  | 3%            | DALY            | No                      | 2017         |
| Levin     | 2015                | China                   | Individual, Static                                                 | CIN (3), cervical cancer                                                      | Females (9 years and older)   | Lifetime  | Government        | Unclear       | Deaths averted  | Calibration             | 2009         |
| Liu       | 2016                | China (rural, urban)    | Cohort, Static                                                     | CIN (3), cervical cancer                                                      | Females of 12-55 years        | Lifetime  | Healthcare payer  | 3%            | QALY            | Calibration, Validation | 2016*        |
| Luo P     | 2020                | Wuhan City              | Cohort, Static                                                     | Cervical cancer                                                               | Females of 12 years           | Lifetime  | Unclear           | 3%            | DALY            | No                      | 2020*        |
| Luo Y     | 2020                | Zhejiang Province       | Cohort, Static                                                     | High-risk HPV infection<br>Low-grade SIL<br>High-grade SIL<br>Cervical cancer | Females of 12 years           | Lifetime  | Government        | 3%            | QALY            | No                      | 2020*        |
| Ma        | 2020                | China                   | Cohort, Dynamic                                                    | HPV infection (high/low-risk)<br>CIN (3)<br>Cervical cancer<br>Genital wart   | Females (of all ages)         | 50 years  | Unclear           | 3%            | DALY            | Calibration             | 2020         |
| Mo        | 2017                | China                   | Cohort, Static                                                     | HPV infection (high/low-risk)<br>CIN (3)<br>Cervical cancer<br>Genital wart   | Females of 12 years           | Lifetime  | Societal          | 3%            | QALY            | Calibration             | 2015         |
| Qie       | 2017                | Zhejiang Province       | Cohort, Static                                                     | CIN (3), cervical cancer                                                      | Females of 18-25 years        | Unclear   | Healthcare sector | 3%            | QALY            | No                      | 2017*        |
| Song      | 2017                | China                   | Cohort, Dynamic                                                    | CIN (3), cervical cancer                                                      | Males + females               | 100 years | Healthcare sector | 3%            | Life year       | Validation              | 2017*        |
| Sun       | 2017                | Jiangsu Province        | Cohort, Static                                                     | CIN (3), cervical cancer                                                      | Females of 18-25 years        | Lifetime  | Healthcare sector | 3%            | QALY            | No                      | 2017*        |
| Zhang     | 2016                | China (rural, urban)    | Cohort, Static                                                     | CIN (3), cervical cancer                                                      | Females of 12 years           | Lifetime  | Healthcare payer  | 3%            | QALY            | Validation              | 2013         |
| Zou       | 2020                | China                   | Cohort, Static                                                     | CIN (3), cervical cancer                                                      | Females of 9-14 years         | Lifetime  | Healthcare sector | 3%            | QALY            | Calibration, Validation | 2019         |

**Legend:** \* no year of cost reported, using publication year instead. CIN (3): cervical intraepithelial neoplasia (3 stages); SIL: squamous intraepithelial lesion; QALY: quality-adjusted life year; DALY: disability-adjusted life year.

**Table 2. Model assumptions and parameters for HPV vaccine evaluated**

| Reference | Age of vaccination             | Vaccine type                           | No. of doses | Vaccine efficacy                                                                                                    | Vaccine coverage         | Duration of protection                                       | Unit cost reported*                                               | Unit cost in 2021 US\$                                                  |
|-----------|--------------------------------|----------------------------------------|--------------|---------------------------------------------------------------------------------------------------------------------|--------------------------|--------------------------------------------------------------|-------------------------------------------------------------------|-------------------------------------------------------------------------|
| Canfell   | 15                             | Unspecified                            | 3            | 100%                                                                                                                | 70%                      | Lifelong                                                     | Varied in the analysis                                            | Varied in the analysis                                                  |
| Choi      | 12                             | Nonavalent                             | 2            | 95.5% (90.0%-98.4%) for HPV-16<br>95.8% (84.1%-99.5%) for HPV-18<br>96.0% (94.4%-97.2%) for HPV-OV<br>0% for HPV/NV | 25%, 50%<br>and 75%      | 20 years, 30<br>years and<br>lifelong (various<br>scenarios) | US\$284                                                           | US\$303.1                                                               |
| Jiang     | 16                             | Bivalent<br>Quadrivalent<br>Nonavalent | Unclear      | 100%                                                                                                                | 100%                     | Lifelong                                                     | Nonavalent: US\$628<br>Quadrivalent: US\$393<br>Bivalent: US\$291 | Nonavalent: US\$682.5<br>Quadrivalent: US\$427.1<br>Bivalent: US\$316.3 |
| Levin     | <12                            | Unspecified                            | 3            | 100%                                                                                                                | 70%                      | Lifelong                                                     | US\$46                                                            | US\$61.1                                                                |
| Liu       | 12-55                          | Bivalent                               | 3            | 93.2% against CC<br>64.9% against CIN2/3<br>50.3% against CIN1                                                      | 70%                      | Lifelong                                                     | 1954 CNY                                                          | US\$333.2                                                               |
| Luo P     | 12                             | Bivalent                               | 3            | 95% (63%-100%)                                                                                                      | 100%^                    | Lifelong                                                     | 1999 CNY                                                          | US\$308.4                                                               |
| Luo Y     | 12                             | Bivalent                               | 2            | 76.78% (40%-100%)                                                                                                   | 70%                      | Lifelong                                                     | 1040 CNY                                                          | US\$160.4                                                               |
| Ma        | 9-16                           | Quadrivalent                           | Unclear      | 78.9% (74.5%-82.4%)                                                                                                 | 50%                      | 5% rate of<br>immunity waning                                | US\$ 451                                                          | US\$452.3                                                               |
| Mo        | 12                             | Bivalent<br>Quadrivalent<br>Nonavalent | 3            | Bivalent: 80.7% (57.5%-98.9%)<br>Quadrivalent: 81.5% (58.8%-98.2%)<br>Nonavalent: 90.8% (66.5%-100%)                | 20% (10%-<br>100% in SA) | Lifelong                                                     | Bi/Quadrivalent: US\$408<br>Nonavalent: US\$ 452                  | Bi/Quadrivalent: US\$459.6<br>Nonavalent: US\$509.1                     |
| Qie       | 18-25                          | Bivalent                               | 3            | 100%                                                                                                                | 80%                      | Lifelong                                                     | 1842 CNY                                                          | US\$308.0                                                               |
| Song      | Primary: 15<br>Expanded: 16-39 | Bivalent                               | 3            | 100%                                                                                                                | 70%                      | Lifelong                                                     | 1995 CNY                                                          | US\$333.6                                                               |
| Sun       | 18-25                          | Bivalent                               | 3            | 94.2% (62.7%-99.9%)                                                                                                 | 100%^                    | Lifelong                                                     | 2000 CNY                                                          | US\$334.4                                                               |
| Zhang     | 12                             | Bivalent                               | 3            | 93.2% (78.9%-98.7%) against CC<br>64.9% (52.7%-74.9%) against CIN2/3<br>50.3% (40.2%-58.8%) against CIN1            | 70%                      | Lifelong                                                     | 301 CNY                                                           | US\$54.2                                                                |
| Zou       | 9-14                           | Bivalent                               | 2            | 94% (80%-99%)                                                                                                       | 70% (50-<br>95% in SA)   | Lifelong                                                     | US\$ 99.8                                                         | US\$104.7                                                               |

**Legend:** \* total cost per girl/woman vaccinated, including medical cost for multiple doses and other relevant costs (e.g., vaccine administration). ^ among individuals with negative screening results. CC: cervical cancer; CIN: cervical intraepithelial neoplasia; OV: other five high-risk HPV targeted by the nonavalent vaccine; NV: non-vaccine high-risk HPV; CNY: Chinese yuan.

**Table 3. Cost-effectiveness of HPV vaccination strategies**

| Reference | Intervention                                                                                                             | Comparator                                                      | ICER reported                                                    | ICER in 2021 US\$                                            | Threshold                 | Conclusion                                                                                                                                                                                                                                               | Sensitivity analysis   | Most sensitive parameters                                           |
|-----------|--------------------------------------------------------------------------------------------------------------------------|-----------------------------------------------------------------|------------------------------------------------------------------|--------------------------------------------------------------|---------------------------|----------------------------------------------------------------------------------------------------------------------------------------------------------------------------------------------------------------------------------------------------------|------------------------|---------------------------------------------------------------------|
| Canfell   | Combination of: vaccination and different screening strategies (with different frequencies)                              | No vaccination, no screening                                    | -                                                                | -                                                            | GDP: \$3,077              | Strategies involving vaccination would be cost-effective at CVGs of US\$50–54 or less, but at CVGs >\$54, screening-only strategies would be more cost-effective                                                                                         | One-way, probabilistic | Discounting rate<br>Cost of HPV screening<br>Duration of protection |
| Choi      | Vaccination (routine) at different coverage levels                                                                       | Opportunistic vaccination (12% coverage)                        | -                                                                | -                                                            | GDP: \$40,099             | Cost-effective across all three vaccination coverage levels. Will remain cost-effective if the cost of fully vaccinating one girl is no greater than \$689 (\$646–734), respectively.                                                                    | Probabilistic          | -                                                                   |
| Jiang     | Nonavalent vaccine                                                                                                       | Quadrivalent, bivalent vaccine                                  | US\$35,000/DALY vs. quadrivalent<br>US\$50,455/DALY vs. bivalent | \$38,040/DALY vs. quadrivalent<br>\$54,837/DALY vs. bivalent | 1-3 * GDP:<br>US\$8,640   | Not cost-effective compared with the quadrivalent and the bivalent vaccines. To be cost-effective, the 9-valent vaccine should be priced at \$550 and \$450 for the full doses, respectively                                                             | One-way                | Discounting rate<br>CC mortality<br>Age of vaccination              |
| Levin     | Vaccination (targeting different income groups) + screening                                                              | Screening only                                                  | US\$10,920 - US\$13,277 per death averted                        | \$14,504 - \$17,635 per death averted                        | -                         | Cost-effective across all income groups. Would remain cost-effective if the cost is less than US\$50 per vaccinated girl.                                                                                                                                | One-way                | Not reported                                                        |
| Liu       | Vaccination (at different ages) + Pap test                                                                               | Pap test only                                                   | Varied by age                                                    | -                                                            | 1-3 * GDP:<br>41,908 CNY  | Vaccination is cost-effective at any age under 23 years in rural and any age under 25 years in urban areas. Catch-up vaccination to the age of 25 years in addition to routine vaccination in 12-year-old in both rural and urban can be cost-effective. | No                     | -                                                                   |
| Luo P     | Vaccination                                                                                                              | No vaccination                                                  | 83,496 CNY/DALY                                                  | \$12,881/DALY                                                | 1-3 * GDP:<br>52,000 CNY  | Very cost-effective                                                                                                                                                                                                                                      | One-way                | Discounting rate<br>Cost of vaccine<br>Cost of CC treatment         |
| Luo Y     | Vaccination                                                                                                              | No vaccination                                                  | 12,472 CNY/QALY                                                  | \$1,924/QALY                                                 | 1-3 * GDP:<br>92,100 CNY  | Very cost-effective                                                                                                                                                                                                                                      | One-way                | Cost of vaccine<br>Discounting rate<br>QALY estimates               |
| Ma        | Combination of: universal vaccination (coverage : 0%-90%) and screening (coverage: 20%-70%)                              | Status quo (0% vaccination coverage and 20% screening coverage) | -                                                                | -                                                            | 1-3 * GDP:<br>US\$ 10,264 | The addition of universal vaccination to screening programs is not cost-effective. The vaccine requires at least a 50% price reduction to be cost-effective.                                                                                             | Probabilistic          | -                                                                   |
| Mo        | Combination of: different types of vaccination and screening methods                                                     | No vaccination, no screening                                    | -                                                                | -                                                            | 1-3 * GDP:<br>US\$ 7,960  | Optimal: nonavalent vaccination + VIA screening. Quadrivalent/nonavalent vaccine, in combination with current screening strategies, is highly cost-effective and dominates bivalent vaccine                                                              | One-way                | Vaccine efficacy<br>Cost of vaccine<br>Discounting rate             |
| Qie       | Vaccination + Pap test                                                                                                   | Pap test only                                                   | 43,490 CNY/QALY                                                  | \$7,272/QALY                                                 | 1-3 * GDP:<br>52,000 CNY  | Very cost-effective                                                                                                                                                                                                                                      | No                     | -                                                                   |
| Song      | Combination of: different vaccination (at different ages) and VIA/VILI screening (with different frequencies) strategies | No vaccination, no screening                                    | -                                                                | -                                                            | 1-3 * GDP:<br>50,696 CNY  | Vaccination (at age 15) + screening twice in a lifetime (at age 35 and 45) is cost-effective compared to no intervention.<br>Optimal: screening twice in a lifetime*                                                                                     | One-way                | Discounting rate<br>Cost of vaccine<br>Vaccine coverage             |

1  
2  
3  
4  
5  
6  
7  
8  
9  
10  
11  
12  
13  
14  
15  
16  
17  
18  
19  
20  
21  
22  
23  
24  
25  
26  
27  
28  
29  
30  
31  
32  
33  
34  
35  
36  
37  
38  
39  
40  
41  
42  
43  
44  
45  
46  
47

|       |                                                                                      |                              |                                                 |                                            |                        |                                                                                                                                                                                                                      |                                 |                                                           |
|-------|--------------------------------------------------------------------------------------|------------------------------|-------------------------------------------------|--------------------------------------------|------------------------|----------------------------------------------------------------------------------------------------------------------------------------------------------------------------------------------------------------------|---------------------------------|-----------------------------------------------------------|
| Sun   | Vaccination + Pap test                                                               | Pap test only                | 43,489 CNY/QALY                                 | \$7,272/QALY                               | 1-3 * GDP: 52,000 CNY  | Very cost-effective                                                                                                                                                                                                  | One-way                         | Discounting rate<br>Vaccine efficacy<br>Cost of vaccine   |
| Zhang | Vaccination + screening                                                              | Screening only               | Rural: 11,365 CNY/QALY<br>Urban: 6,124 CNY/QALY | Rural: \$2,047/QALY<br>Urban: \$1,103/QALY | 1-3 * GDP: 41,908 CNY  | Very cost-effective. Would remain very cost-effective if vaccine cost is below 630 CNY in rural and 750 CNY in urban; and remain cost-effective if below 1,700 CNY in rural and 1,900 CNY in urban                   | One-way, two-way, probabilistic | Cost of vaccine<br>Discounting rate<br>HPV infection rate |
| Zou   | Combination of: vaccination and various screening methods with different frequencies | No vaccination, no screening | -                                               | -                                          | 1-3 * GDP: US\$ 10,276 | Optimal: vaccination + careHPV screening every 5 years. Strategies that combined vaccination and screening would be more cost-effective than screening alone strategies when the vaccination cost was less than \$50 | One-way, probabilistic          | -                                                         |

**Legend:** \* based on analysis of the reported cost-effectiveness frontier outcomes (rather than what the authors reported). ICER: incremental cost-effectiveness ratio; GDP: gross domestic product per capita; CVG: cost per vaccinated girl; VIA: visual inspection with acetic acid; CC: cervical cancer; CNY: Chinese yuan; QALY: quality-adjusted life year; DALY: disability-adjusted life year.

For peer review only

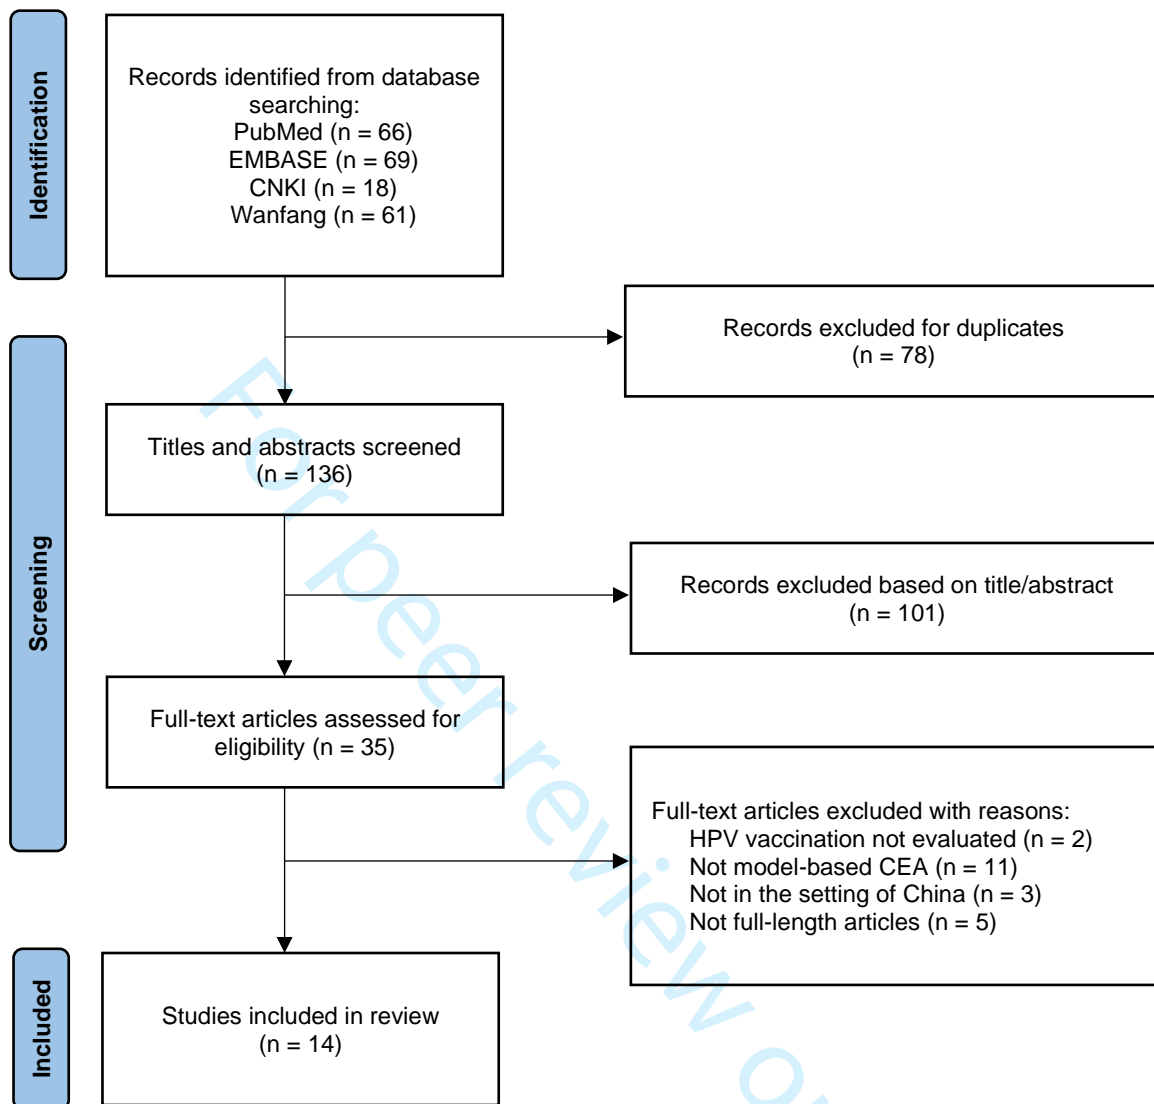



1  
2  
3  
4  
5  
6  
7  
8  
9  
10  
11  
12  
13  
14  
15  
16  
17  
18  
19  
20  
21  
22  
23  
24  
25  
26  
27  
28  
29  
30  
31  
32  
33  
34  
35  
36  
37  
38  
39  
40  
41  
42  
43  
44  
45  
46  
47  
48  
49  
50  
51  
52  
53  
54  
55  
56  
57  
58  
59  
60

**Supplementary Appendix**

For peer review only

Table S1 PRISMA Checklist

| Section / topic                    | #  | Checklist item                                                                                                                                                                                                                                                                                              | Location where item is reported |
|------------------------------------|----|-------------------------------------------------------------------------------------------------------------------------------------------------------------------------------------------------------------------------------------------------------------------------------------------------------------|---------------------------------|
| <b>TITLE</b>                       |    |                                                                                                                                                                                                                                                                                                             |                                 |
| Title                              | 1  | Identify the report as a systematic review, meta-analysis, or both.                                                                                                                                                                                                                                         | Title                           |
| <b>ABSTRACT</b>                    |    |                                                                                                                                                                                                                                                                                                             |                                 |
| Structured summary                 | 2  | Provide a structured summary including, as applicable: background; objectives; data sources; study eligibility criteria, participants, and interventions; study appraisal and synthesis methods; results; limitations; conclusions and implications of key findings; systematic review registration number. | Abstract                        |
| <b>INTRODUCTION</b>                |    |                                                                                                                                                                                                                                                                                                             |                                 |
| Rationale                          | 3  | Describe the rationale for the review in the context of what is already known.                                                                                                                                                                                                                              | Intro, par 4                    |
| Objectives                         | 4  | Provide an explicit statement of questions being addressed with reference to participants, interventions, comparisons, outcomes, and study design (PICOS).                                                                                                                                                  | Intro, par 5                    |
| <b>METHODS</b>                     |    |                                                                                                                                                                                                                                                                                                             |                                 |
| Protocol and registration          | 5  | Indicate if a review protocol exists, if and where it can be accessed (e.g., Web address), and, if available, provide registration information including registration number.                                                                                                                               | Methods, par 1                  |
| Eligibility criteria               | 6  | Specify study characteristics (e.g., PICOS, length of follow-up) and report characteristics (e.g., years considered, language, publication status) used as criteria for eligibility, giving rationale.                                                                                                      | Methods, par 1-2                |
| Information sources                | 7  | Describe all information sources (e.g., databases with dates of coverage, contact with study authors to identify additional studies) in the search and date last searched.                                                                                                                                  | Methods, par 1                  |
| Search                             | 8  | Present full electronic search strategy for at least one database, including any limits used, such that it could be repeated.                                                                                                                                                                               | Table S2-3                      |
| Study selection                    | 9  | State the process for selecting studies (i.e., screening, eligibility, included in systematic review, and, if applicable, included in the meta-analysis).                                                                                                                                                   | Methods, par 2                  |
| Data collection process            | 10 | Describe method of data extraction from reports (e.g., piloted forms, independently, in duplicate) and any processes for obtaining and confirming data from investigators.                                                                                                                                  | Methods, par 3                  |
| Data items                         | 11 | List and define all variables for which data were sought (e.g., PICOS, funding sources) and any assumptions and simplifications made.                                                                                                                                                                       | Methods, par 4                  |
| Risk of bias in individual studies | 12 | Describe methods used for assessing risk of bias of individual studies (including specification of whether this was done at the study or outcome level), and how this information is to be used in any data synthesis.                                                                                      | NA                              |
| Summary measures                   | 13 | State the principal summary measures (e.g., risk ratio, difference in means).                                                                                                                                                                                                                               | Methods, par 3                  |
| Synthesis of results               | 14 | Describe the methods of handling data and combining results of studies, if done, including measures of consistency (e.g., $I^2$ ) for each meta-analysis.                                                                                                                                                   | Methods, par 4                  |
| Risk of bias across studies        | 15 | Specify any assessment of risk of bias that may affect the cumulative evidence (e.g., publication bias, selective reporting within studies).                                                                                                                                                                | NA                              |
| Additional analyses                | 16 | Describe methods of additional analyses (e.g., sensitivity or subgroup analyses, meta-regression), if done, indicating which were pre-specified.                                                                                                                                                            | Methods, par 4                  |
| <b>RESULTS</b>                     |    |                                                                                                                                                                                                                                                                                                             |                                 |
| Study selection                    | 17 | Give numbers of studies screened, assessed for eligibility, and included in the review, with reasons for exclusions at each stage, ideally with a flow diagram.                                                                                                                                             | Figure 1                        |
| Study                              | 18 | For each study, present characteristics for which data were extracted (e.g., study size, PICOS, follow-up period) and provide the citations.                                                                                                                                                                | Results, par 1                  |

|    |                               |    |                                                                                                                                                                                                          |                     |
|----|-------------------------------|----|----------------------------------------------------------------------------------------------------------------------------------------------------------------------------------------------------------|---------------------|
| 1  | characteristics               |    |                                                                                                                                                                                                          |                     |
| 2  | Risk of bias within studies   | 19 | Present data on risk of bias of each study and, if available, any outcome level assessment (see item 20).                                                                                                | NA                  |
| 3  |                               |    |                                                                                                                                                                                                          |                     |
| 4  | Results of individual studies | 20 | For all outcomes considered (benefits or harms), present, for each study: (a) simple summary data for each intervention group (b) effect estimates and confidence intervals, ideally with a forest plot. | Table 3             |
| 5  |                               |    |                                                                                                                                                                                                          |                     |
| 6  | Synthesis of results          | 21 | Present results of each meta-analysis done, including confidence intervals and measures of consistency.                                                                                                  | NA                  |
| 7  | Risk of bias across studies   | 22 | Present results of any assessment of risk of bias across studies.                                                                                                                                        | NA                  |
| 8  |                               |    |                                                                                                                                                                                                          |                     |
| 9  | Additional analysis           | 23 | Give results of additional analyses, if done (e.g., sensitivity or subgroup analyses, meta-regression)                                                                                                   | Results, par 5      |
| 10 |                               |    |                                                                                                                                                                                                          |                     |
| 11 | <b>DISCUSSION</b>             |    |                                                                                                                                                                                                          |                     |
| 12 | Summary of evidence           | 24 | Summarize the main findings including the strength of evidence for each main outcome; consider their relevance to key groups (e.g., healthcare providers, users, and policy makers).                     | Discussion, par 1-2 |
| 13 |                               |    |                                                                                                                                                                                                          |                     |
| 14 | Limitations                   | 25 | Discuss limitations at study and outcome level (e.g., risk of bias), and at review-level (e.g., incomplete retrieval of identified research, reporting bias).                                            | Discussion, par 5   |
| 15 |                               |    |                                                                                                                                                                                                          |                     |
| 16 | Conclusions                   | 26 | Provide a general interpretation of the results in the context of other evidence, and implications for future research.                                                                                  | Discussion, par 3-4 |
| 17 |                               |    |                                                                                                                                                                                                          |                     |
| 18 | <b>FUNDING</b>                |    |                                                                                                                                                                                                          |                     |
| 19 | Funding                       | 27 | Describe sources of funding for the systematic review and other support (e.g., supply of data); role of funders for the systematic review.                                                               | Acknowledgement     |

Intro: introduction; par: paragraph; NA: not applicable

review only

**Table S2 Search strategy and key terms in PubMed and EMBASE databases**

|           | <b>AND</b>           | <b>AND</b>  | <b>AND</b>          | <b>AND</b> |
|-----------|----------------------|-------------|---------------------|------------|
| <b>OR</b> | Human papillomavirus | Vaccine     | Cost-effectiveness  | China      |
| <b>OR</b> | HPV                  | Vaccination | Cost-benefit        |            |
| <b>OR</b> | Cervical cancer      | Immune*     | Cost-utility        |            |
| <b>OR</b> |                      |             | Cost-effective      |            |
| <b>OR</b> |                      |             | Model*              |            |
| <b>OR</b> |                      |             | Economic evaluation |            |
| <b>OR</b> |                      |             | Pharmacoeconomic*   |            |

The search was conducted by title/abstract.

**Table S3 Search strategy and key terms in China National Knowledge Infrastructure and Wanfang databases**

|    | AND    | AND | AND     | AND |
|----|--------|-----|---------|-----|
| OR | 人乳头瘤病毒 | 疫苗  | 成本效用    | 中国  |
| OR | HPV    | 免疫  | 成本收益    |     |
| OR | 宫颈癌    |     | 成本效益    |     |
| OR |        |     | 成本效果    |     |
| OR |        |     | 模型分析    |     |
| OR |        |     | 经济学评价   |     |
| OR |        |     | 药物经济学评价 |     |

The search was conducted by title/abstract

**Table S4 Quality assessment of model reporting against CHEERS checklist**

| Reference                                                 | Canfell | Choi | Jiang | Levin | Liu | Luo P | Luo Y | Ma  | Mo   | Qie | Song | Sun | Zhang | Zou  |
|-----------------------------------------------------------|---------|------|-------|-------|-----|-------|-------|-----|------|-----|------|-----|-------|------|
| Title and abstract                                        |         |      |       |       |     |       |       |     |      |     |      |     |       |      |
| Title                                                     | 0       | 0    | 1     | 1     | 1   | 1     | 1     | 1   | 1    | 1   | 1    | 1   | 1     | 1    |
| Abstract                                                  | 1       | 1    | 1     | 1     | 1   | 0.5   | 1     | 1   | 1    | 0.5 | 1    | 0.5 | 1     | 1    |
| Introduction                                              |         |      |       |       |     |       |       |     |      |     |      |     |       |      |
| Background & objectives                                   | 1       | 1    | 1     | 1     | 1   | 0.5   | 1     | 1   | 1    | 1   | 1    | 1   | 1     | 1    |
| Methods                                                   |         |      |       |       |     |       |       |     |      |     |      |     |       |      |
| Target population & subgroup                              | 1       | 1    | 1     | 1     | 1   | 1     | 1     | 1   | 1    | 1   | 0    | 1   | 1     | 1    |
| Setting and location                                      | 1       | 1    | 1     | 1     | 1   | 1     | 1     | 1   | 1    | 1   | 1    | 1   | 1     | 1    |
| Study perspective                                         | 1       | 0    | 1     | 0     | 1   | 0     | 1     | 0   | 1    | 0   | 1    | 1   | 1     | 1    |
| Comparators                                               | 1       | 1    | 1     | 1     | 1   | 1     | 1     | 1   | 1    | 1   | 1    | 1   | 1     | 1    |
| Time horizon                                              | 1       | 1    | 1     | 1     | 1   | 0     | 1     | 1   | 1    | 0   | 1    | 1   | 1     | 1    |
| Discount rate                                             | 1       | 1    | 1     | 0     | 1   | 1     | 1     | 1   | 1    | 1   | 1    | 1   | 1     | 1    |
| Choice of health outcomes                                 | 1       | 1    | 1     | 1     | 1   | 0     | 1     | 1   | 1    | 0   | 1    | 0   | 1     | 1    |
| Measures of effectiveness                                 | 1       | 1    | 0     | 0     | 1   | 0     | 1     | 1   | 1    | 0   | 0    | 1   | 1     | 1    |
| Preference based outcomes                                 | N/A     | 1    | 0     | N/A   | 1   | 0     | 1     | 1   | 1    | 0   | N/A  | 1   | 1     | 1    |
| Estimating resources & costs                              | 1       | 1    | 1     | 1     | 1   | 1     | 1     | 1   | 1    | 0.5 | 1    | 1   | 1     | 1    |
| Currency, price date, and conversion                      | 1       | 0    | 0     | 1     | 0   | 0     | 0     | 1   | 1    | 0   | 0    | 0   | 1     | 1    |
| Choice of model                                           | 1       | 1    | 1     | 1     | 1   | 1     | 1     | 1   | 1    | 1   | 1    | 1   | 1     | 1    |
| Assumptions                                               | 1       | 1    | 1     | 1     | 1   | 0     | 1     | 1   | 1    | 0   | 1    | 1   | 1     | 1    |
| Analytical methods                                        | 1       | 1    | 1     | 1     | 1   | 1     | 1     | 1   | 1    | 0.5 | 1    | 1   | 1     | 1    |
| Results                                                   |         |      |       |       |     |       |       |     |      |     |      |     |       |      |
| Study parameters                                          | 1       | 1    | 1     | 1     | 1   | 0.5   | 1     | 1   | 1    | 0.5 | 0.5  | 1   | 1     | 1    |
| Incremental costs & outcomes                              | 1       | 1    | 1     | 0     | 1   | 1     | 1     | 1   | 1    | 1   | 1    | 1   | 1     | 1    |
| Characterizing uncertainty                                | 1       | 1    | 1     | 1     | 0   | 1     | 1     | 1   | 1    | 0   | 1    | 1   | 1     | 1    |
| Characterizing heterogeneity                              | 1       | N/A  | N/A   | 1     | 1   | N/A   | N/A   | N/A | N/A  | N/A | N/A  | N/A | 1     | 1    |
| Discussion                                                |         |      |       |       |     |       |       |     |      |     |      |     |       |      |
| Study findings, limitations, generalizability & knowledge | 0.5     | 1    | 1     | 1     | 1   | 0.5   | 1     | 1   | 1    | 0.5 | 0.5  | 1   | 1     | 1    |
| Other                                                     |         |      |       |       |     |       |       |     |      |     |      |     |       |      |
| Source of funding                                         | 1       | 1    | 1     | 1     | 1   | 0     | 1     | 1   | 1    | 0   | 1    | 0   | 1     | 1    |
| Conflicts of interest                                     | 1       | 1    | 1     | 1     | 1   | 0     | 1     | 1   | 1    | 0   | 0    | 0   | 1     | 1    |
| Total % of Yes                                            | 93%     | 87%  | 87%   | 83%   | 92% | 52%   | 96%   | 96% | 100% | 46% | 77%  | 80% | 100%  | 100% |

“1”: meets the assessment criteria; “0.5”: partially meets the assessment criteria; “0”: does not meets the assessment criteria.

## PRISMA Checklist

| Section / topic                    | #  | Checklist item                                                                                                                                                                                                                                                                                              | Location where item is reported |
|------------------------------------|----|-------------------------------------------------------------------------------------------------------------------------------------------------------------------------------------------------------------------------------------------------------------------------------------------------------------|---------------------------------|
| <b>TITLE</b>                       |    |                                                                                                                                                                                                                                                                                                             |                                 |
| Title                              | 1  | Identify the report as a systematic review, meta-analysis, or both.                                                                                                                                                                                                                                         | Title                           |
| <b>ABSTRACT</b>                    |    |                                                                                                                                                                                                                                                                                                             |                                 |
| Structured summary                 | 2  | Provide a structured summary including, as applicable: background; objectives; data sources; study eligibility criteria, participants, and interventions; study appraisal and synthesis methods; results; limitations; conclusions and implications of key findings; systematic review registration number. | Abstract                        |
| <b>INTRODUCTION</b>                |    |                                                                                                                                                                                                                                                                                                             |                                 |
| Rationale                          | 3  | Describe the rationale for the review in the context of what is already known.                                                                                                                                                                                                                              | Intro, par 4                    |
| Objectives                         | 4  | Provide an explicit statement of questions being addressed with reference to participants, interventions, comparisons, outcomes, and study design (PICOS).                                                                                                                                                  | Intro, par 5                    |
| <b>METHODS</b>                     |    |                                                                                                                                                                                                                                                                                                             |                                 |
| Protocol and registration          | 5  | Indicate if a review protocol exists, if and where it can be accessed (e.g., Web address), and, if available, provide registration information including registration number.                                                                                                                               | Methods, par 1                  |
| Eligibility criteria               | 6  | Specify study characteristics (e.g., PICOS, length of follow-up) and report characteristics (e.g., years considered, language, publication status) used as criteria for eligibility, giving rationale.                                                                                                      | Methods, par 1-2                |
| Information sources                | 7  | Describe all information sources (e.g., databases with dates of coverage, contact with study authors to identify additional studies) in the search and date last searched.                                                                                                                                  | Methods, par 1                  |
| Search                             | 8  | Present full electronic search strategy for at least one database, including any limits used, such that it could be repeated.                                                                                                                                                                               | Table S2-3                      |
| Study selection                    | 9  | State the process for selecting studies (i.e., screening, eligibility, included in systematic review, and, if applicable, included in the meta-analysis).                                                                                                                                                   | Methods, par 2                  |
| Data collection process            | 10 | Describe method of data extraction from reports (e.g., piloted forms, independently, in duplicate) and any processes for obtaining and confirming data from investigators.                                                                                                                                  | Methods, par 3                  |
| Data items                         | 11 | List and define all variables for which data were sought (e.g., PICOS, funding sources) and any assumptions and simplifications made.                                                                                                                                                                       | Methods, par 4                  |
| Risk of bias in individual studies | 12 | Describe methods used for assessing risk of bias of individual studies (including specification of whether this was done at the study or outcome level), and how this information is to be used in any data synthesis.                                                                                      | NA                              |
| Summary measures                   | 13 | State the principal summary measures (e.g., risk ratio, difference in means).                                                                                                                                                                                                                               | Methods, par 3                  |
| Synthesis of results               | 14 | Describe the methods of handling data and combining results of studies, if done, including measures of consistency (e.g., $I^2$ ) for each meta-analysis.                                                                                                                                                   | Methods, par 4                  |
| Risk of bias across studies        | 15 | Specify any assessment of risk of bias that may affect the cumulative evidence (e.g., publication bias, selective reporting within studies).                                                                                                                                                                | NA                              |
| Additional analyses                | 16 | Describe methods of additional analyses (e.g., sensitivity or subgroup analyses, meta-regression), if done, indicating which were pre-specified.                                                                                                                                                            | Methods, par 4                  |
| <b>RESULTS</b>                     |    |                                                                                                                                                                                                                                                                                                             |                                 |
| Study selection                    | 17 | Give numbers of studies screened, assessed for eligibility, and included in the review, with reasons for exclusions at each stage, ideally with a flow diagram.                                                                                                                                             | Figure 1                        |
| Study                              | 18 | For each study, present characteristics for which data were extracted (e.g., study size, PICOS, follow-up period) and provide the citations.                                                                                                                                                                | Results, par 1                  |

|                               |    |                                                                                                                                                                                                          |                     |
|-------------------------------|----|----------------------------------------------------------------------------------------------------------------------------------------------------------------------------------------------------------|---------------------|
| characteristics               |    |                                                                                                                                                                                                          |                     |
| Risk of bias within studies   | 19 | Present data on risk of bias of each study and, if available, any outcome level assessment (see item 20).                                                                                                | NA                  |
| Results of individual studies | 20 | For all outcomes considered (benefits or harms), present, for each study: (a) simple summary data for each intervention group (b) effect estimates and confidence intervals, ideally with a forest plot. | Table 3             |
| Synthesis of results          | 21 | Present results of each meta-analysis done, including confidence intervals and measures of consistency.                                                                                                  | NA                  |
| Risk of bias across studies   | 22 | Present results of any assessment of risk of bias across studies.                                                                                                                                        | NA                  |
| Additional analysis           | 23 | Give results of additional analyses, if done (e.g., sensitivity or subgroup analyses, meta-regression)                                                                                                   | Results, par 5      |
| <b>DISCUSSION</b>             |    |                                                                                                                                                                                                          |                     |
| Summary of evidence           | 24 | Summarize the main findings including the strength of evidence for each main outcome; consider their relevance to key groups (e.g., healthcare providers, users, and policy makers).                     | Discussion, par 1-2 |
| Limitations                   | 25 | Discuss limitations at study and outcome level (e.g., risk of bias), and at review-level (e.g., incomplete retrieval of identified research, reporting bias).                                            | Discussion, par 5   |
| Conclusions                   | 26 | Provide a general interpretation of the results in the context of other evidence, and implications for future research.                                                                                  | Discussion, par 3-4 |
| <b>FUNDING</b>                |    |                                                                                                                                                                                                          |                     |
| Funding                       | 27 | Describe sources of funding for the systematic review and other support (e.g., supply of data); role of funders for the systematic review.                                                               | Acknowledgement     |

Intro: introduction; par: paragraph; NA: not applicable



CHEERS checklist

| Reference                                                 | Canfell | Choi | Jiang | Levin | Liu | Luo P | Luo Y | Ma  | Mo   | Qie | Song | Sun | Zhang | Zou  |
|-----------------------------------------------------------|---------|------|-------|-------|-----|-------|-------|-----|------|-----|------|-----|-------|------|
| Title and abstract                                        |         |      |       |       |     |       |       |     |      |     |      |     |       |      |
| Title                                                     | 0       | 0    | 1     | 1     | 1   | 1     | 1     | 1   | 1    | 1   | 1    | 1   | 1     | 1    |
| Abstract                                                  | 1       | 1    | 1     | 1     | 1   | 0.5   | 1     | 1   | 1    | 0.5 | 1    | 0.5 | 1     | 1    |
| Introduction                                              |         |      |       |       |     |       |       |     |      |     |      |     |       |      |
| Background & objectives                                   | 1       | 1    | 1     | 1     | 1   | 0.5   | 1     | 1   | 1    | 1   | 1    | 1   | 1     | 1    |
| Methods                                                   |         |      |       |       |     |       |       |     |      |     |      |     |       |      |
| Target population & subgroup                              | 1       | 1    | 1     | 1     | 1   | 1     | 1     | 1   | 1    | 1   | 0    | 1   | 1     | 1    |
| Setting and location                                      | 1       | 1    | 1     | 1     | 1   | 1     | 1     | 1   | 1    | 1   | 1    | 1   | 1     | 1    |
| Study perspective                                         | 1       | 0    | 1     | 0     | 1   | 0     | 1     | 0   | 1    | 0   | 1    | 1   | 1     | 1    |
| Comparators                                               | 1       | 1    | 1     | 1     | 1   | 1     | 1     | 1   | 1    | 1   | 1    | 1   | 1     | 1    |
| Time horizon                                              | 1       | 1    | 1     | 1     | 1   | 0     | 1     | 1   | 1    | 0   | 1    | 1   | 1     | 1    |
| Discount rate                                             | 1       | 1    | 1     | 0     | 1   | 1     | 1     | 1   | 1    | 1   | 1    | 1   | 1     | 1    |
| Choice of health outcomes                                 | 1       | 1    | 1     | 1     | 1   | 0     | 1     | 1   | 1    | 0   | 1    | 0   | 1     | 1    |
| Measures of effectiveness                                 | 1       | 1    | 0     | 0     | 1   | 0     | 1     | 1   | 1    | 0   | 0    | 1   | 1     | 1    |
| Preference based outcomes                                 | N/A     | 1    | 0     | N/A   | 1   | 0     | 1     | 1   | 1    | 0   | N/A  | 1   | 1     | 1    |
| Estimating resources & costs                              | 1       | 1    | 1     | 1     | 1   | 1     | 1     | 1   | 1    | 0.5 | 1    | 1   | 1     | 1    |
| Currency, price date, and conversion                      | 1       | 0    | 0     | 1     | 0   | 0     | 0     | 1   | 1    | 0   | 0    | 0   | 1     | 1    |
| Choice of model                                           | 1       | 1    | 1     | 1     | 1   | 1     | 1     | 1   | 1    | 1   | 1    | 1   | 1     | 1    |
| Assumptions                                               | 1       | 1    | 1     | 1     | 1   | 0     | 1     | 1   | 1    | 0   | 1    | 1   | 1     | 1    |
| Analytical methods                                        | 1       | 1    | 1     | 1     | 1   | 1     | 1     | 1   | 1    | 0.5 | 1    | 1   | 1     | 1    |
| Results                                                   |         |      |       |       |     |       |       |     |      |     |      |     |       |      |
| Study parameters                                          | 1       | 1    | 1     | 1     | 1   | 0.5   | 1     | 1   | 1    | 0.5 | 0.5  | 1   | 1     | 1    |
| Incremental costs & outcomes                              | 1       | 1    | 1     | 0     | 1   | 1     | 1     | 1   | 1    | 1   | 1    | 1   | 1     | 1    |
| Characterizing uncertainty                                | 1       | 1    | 1     | 1     | 0   | 1     | 1     | 1   | 1    | 0   | 1    | 1   | 1     | 1    |
| Characterizing heterogeneity                              | 1       | N/A  | N/A   | 1     | 1   | N/A   | N/A   | N/A | N/A  | N/A | N/A  | N/A | 1     | 1    |
| Discussion                                                |         |      |       |       |     |       |       |     |      |     |      |     |       |      |
| Study findings, limitations, generalizability & knowledge | 0.5     | 1    | 1     | 1     | 1   | 0.5   | 1     | 1   | 1    | 0.5 | 0.5  | 1   | 1     | 1    |
| Other                                                     |         |      |       |       |     |       |       |     |      |     |      |     |       |      |
| Source of funding                                         | 1       | 1    | 1     | 1     | 1   | 0     | 1     | 1   | 1    | 0   | 1    | 0   | 1     | 1    |
| Conflicts of interest                                     | 1       | 1    | 1     | 1     | 1   | 0     | 1     | 1   | 1    | 0   | 0    | 0   | 1     | 1    |
| Total % of Yes                                            | 93%     | 87%  | 87%   | 83%   | 92% | 52%   | 96%   | 96% | 100% | 46% | 77%  | 80% | 100%  | 100% |

1  
2 “1”: meets the assessment criteria; “0.5”: partially meets the assessment criteria; “0”: does not meets the assessment criteria.  
3  
4  
5  
6  
7  
8  
9  
10  
11  
12  
13  
14  
15  
16  
17  
18  
19  
20  
21  
22  
23  
24  
25  
26  
27  
28  
29  
30  
31  
32  
33  
34  
35  
36  
37  
38  
39  
40  
41  
42  
43  
44  
45  
46  
47

For peer review only

# BMJ Open

## The cost-effectiveness of human papillomavirus vaccine in China: a systematic review of modeling studies

|                                 |                                                                                                                                                                                                                                                                                                                                                                                                                                                                                      |
|---------------------------------|--------------------------------------------------------------------------------------------------------------------------------------------------------------------------------------------------------------------------------------------------------------------------------------------------------------------------------------------------------------------------------------------------------------------------------------------------------------------------------------|
| Journal:                        | <i>BMJ Open</i>                                                                                                                                                                                                                                                                                                                                                                                                                                                                      |
| Manuscript ID                   | bmjopen-2021-052682.R1                                                                                                                                                                                                                                                                                                                                                                                                                                                               |
| Article Type:                   | Original research                                                                                                                                                                                                                                                                                                                                                                                                                                                                    |
| Date Submitted by the Author:   | 28-Oct-2021                                                                                                                                                                                                                                                                                                                                                                                                                                                                          |
| Complete List of Authors:       | Shi, Wenchuan; Nanjing University of Chinese Medicine, School of Health Economics and Management<br>Cheng, Xiaoli; Beijing University of Chinese Medicine, Dongfang Hospital<br>Wang, Haitao; Beijing University of Chinese Medicine Affiliated Chongqing Traditional Chinese Medicine Hospital<br>Zang, Xiao; Brown University School of Public Health, Department of Epidemiology<br>Chen, Tingting; Nanjing University of Chinese Medicine, The First School of Clinical Medicine |
| <b>Primary Subject Heading</b>: | Health economics                                                                                                                                                                                                                                                                                                                                                                                                                                                                     |
| Secondary Subject Heading:      | Infectious diseases                                                                                                                                                                                                                                                                                                                                                                                                                                                                  |
| Keywords:                       | Infection control < INFECTIOUS DISEASES, HEALTH ECONOMICS, Health policy < HEALTH SERVICES ADMINISTRATION & MANAGEMENT, ONCOLOGY                                                                                                                                                                                                                                                                                                                                                     |
|                                 |                                                                                                                                                                                                                                                                                                                                                                                                                                                                                      |

SCHOLARONE™  
Manuscripts



I, the Submitting Author has the right to grant and does grant on behalf of all authors of the Work (as defined in the below author licence), an exclusive licence and/or a non-exclusive licence for contributions from authors who are: i) UK Crown employees; ii) where BMJ has agreed a CC-BY licence shall apply, and/or iii) in accordance with the terms applicable for US Federal Government officers or employees acting as part of their official duties; on a worldwide, perpetual, irrevocable, royalty-free basis to BMJ Publishing Group Ltd ("BMJ") its licensees and where the relevant Journal is co-owned by BMJ to the co-owners of the Journal, to publish the Work in this journal and any other BMJ products and to exploit all rights, as set out in our [licence](#).

The Submitting Author accepts and understands that any supply made under these terms is made by BMJ to the Submitting Author unless you are acting as an employee on behalf of your employer or a postgraduate student of an affiliated institution which is paying any applicable article publishing charge ("APC") for Open Access articles. Where the Submitting Author wishes to make the Work available on an Open Access basis (and intends to pay the relevant APC), the terms of reuse of such Open Access shall be governed by a Creative Commons licence – details of these licences and which [Creative Commons](#) licence will apply to this Work are set out in our licence referred to above.

Other than as permitted in any relevant BMJ Author's Self Archiving Policies, I confirm this Work has not been accepted for publication elsewhere, is not being considered for publication elsewhere and does not duplicate material already published. I confirm all authors consent to publication of this Work and authorise the granting of this licence.

1  
2  
3 **The cost-effectiveness of human papillomavirus vaccine in China: a**  
4 **systematic review of modeling studies**  
5  
6  
7

8 Wenchuan Shi<sup>1</sup>, Xiaoli Cheng<sup>2</sup>, Haitao Wang<sup>3</sup>, Xiao Zang<sup>4</sup>, Tingting Chen<sup>5</sup>  
9  
10

11  
12 1. School of Health Economics and Management, Nanjing University of Chinese  
13 Medicine, Nanjing, Jiangsu, China; 2. Dongfang Hospital, Beijing University of  
14 Chinese Medicine, Beijing, China; 3. Chongqing Traditional Chinese Medicine  
15 Hospital, Chongqing, China; 4. Department of Epidemiology, School of Public  
16 Health, Brown University, Providence, Rhode Island, United States; 5. The First  
17 School of Clinical Medicine, Nanjing University of Chinese Medicine, Nanjing,  
18 Jiangsu, China  
19  
20  
21  
22

23 **Corresponding Author:**  
24

25 Tingting Chen, MD  
26

27 The First School of Clinical Medicine, Nanjing University of Chinese Medicine  
28

29 138 Xianlin Road  
30

31 Nanjing, Jiangsu, China, 210023  
32

33 Phone: (86)25-85811067  
34

35 Fax: (86)25-85811009  
36

37 E-mail: [tingtingchen@njucm.edu.cn](mailto:tingtingchen@njucm.edu.cn)  
38  
39  
40  
41  
42  
43  
44  
45  
46  
47  
48  
49  
50  
51  
52  
53  
54  
55  
56  
57  
58  
59  
60

## Abstract

**Objectives:** China suffers from high burdens of human papillomavirus (HPV) and cervical cancer, whereas the uptake of HPV vaccine remains low. The first Chinese domestic HPV vaccine was released in 2019. However, collective evidence on cost-effectiveness of HPV vaccination in China has yet to be established. We summarized evidence on the cost-effectiveness of HPV vaccine in China.

**Design:** Systematic review and narrative synthesis

**Data sources:** PubMed, EMBASE, China National Knowledge Infrastructure and Wanfang Data were searched through January 2, 2021

**Eligibility criteria for selecting studies:** Cost-effectiveness studies using a modeling approach focusing on HPV vaccination interventions in the setting of China were included for review

**Data extraction and synthesis:** We extracted information from the selected studies focusing on cost-effectiveness results of various vaccination programs, key contextual and methodological factors influencing cost-effectiveness estimates and an assessment of study quality.

**Results:** A total of 14 studies were included for review. Considerable heterogeneity was found in terms of the methodologies used, HPV vaccination strategies evaluated, and study quality. The reviewed studies generally supported the cost-effectiveness of HPV vaccine in China, although some reached alternative conclusions, particularly when assessed incremental to cervical cancer screening. Cost of vaccination was consistently identified as a key determinant for the cost-effectiveness of HPV vaccination programs.

**Conclusions:** Implementing HPV vaccination programs should be complemented with expanded cervical cancer screening, while the release of lower-priced domestic vaccine offers more promising potential for initiating public HPV vaccination programs. Findings of this study contributes important evidence for

1  
2  
3 policies for cervical cancer prevention in China and methodological implications  
4 for future modeling efforts.  
5

6  
7 **Keywords:** human papillomavirus; vaccine; cost-effectiveness; systematic review;  
8 cervical cancer  
9  
10  
11  
12  
13  
14  
15  
16  
17  
18  
19  
20  
21  
22  
23  
24  
25  
26  
27  
28  
29  
30  
31  
32  
33  
34  
35  
36  
37  
38  
39  
40  
41  
42  
43  
44  
45  
46  
47  
48  
49  
50  
51  
52  
53  
54  
55  
56  
57  
58  
59  
60

### Strengths and limitations of this study

- The first systematic review on the cost-effectiveness of human papillomavirus (HPV) vaccination strategies in the setting of China.
- A total of 14 modeling studies with disparate methodologies focusing on various HPV vaccination programs and strategies were included for view.
- We performed a review of four databases in both English and Chinese on a comprehensive set of contextual and methodological factors to identify key determinants for cost-effectiveness results and optimal vaccination programs.
- Not all aspects and assumptions of a model were evaluated in this review but only the ones we believed were most influential on cost-effectiveness results.



## Introduction

As the leading cause of cervical cancer, human papillomavirus (HPV) is one of the most common sexually transmitted infections both in China and globally.<sup>1</sup> A recent meta-analysis of nearly 200 studies on the prevalence of HPV revealed that as high as 19.0% (95% confidence interval: 17.1%-20.9%) of women in China were infected with high-risk HPVs, while the subtypes with the highest infection rates were 16, 52, 58, 53 and 18.<sup>2</sup> Meanwhile, cervical cancer is the fourth most common cancer for women worldwide, accounting for over 100,000 new cases and 47,000 deaths each year in China.<sup>3</sup> Among all the newly diagnosed cervical cancer cases in China, around 2/3 were found within the age group of 44-64 years.<sup>3</sup> HPV is predominately transmitted through sexual contacts and is also responsible for many other diseases such as anal cancer, oropharyngeal cancer, vaginal and vulvar cancer, penile cancer and genital wart.<sup>4 5</sup>

Cervical cancer is preventable and curable in the early stages. To mobilize efforts to eliminate cervical cancer, the World Health Organization (WHO) has set strategic targets for all countries by 2030, known as the 90-70-90 targets: 90% of girls fully vaccinated by age 15; 70% of women screened twice in a lifetime for cervical cancer (by age 35 and 45); 90% of women identified with cervical disease receive treatment.<sup>6</sup> HPV vaccine has been endorsed as the most effective approach for preventing HPV infection and associated diseases. The United States, Australia, Canada, and the United Kingdom were among the first countries to introduce HPV vaccine into national immunization programs.<sup>7</sup> Population-level impact of HPV vaccine has been evidenced by many prior studies,<sup>8-10</sup> and a

1  
2  
3 recently published study following over 2,000 women from Nordic countries who  
4 have received three doses of quadrivalent HPV vaccine for 14 years demonstrated  
5 a remarkable 100% effectiveness against HPV16/19-related high-grade cervical  
6 dysplasia.<sup>11</sup>  
7  
8  
9

10  
11  
12  
13 It was not until July 2016, a decade after the first HPV vaccine's licensing in the  
14 United States, when the first commercial HPV vaccine, Cervarix, was approved to  
15 use in mainland China.<sup>12</sup> The first Chinese domestic HPV vaccine (Cecolin), a  
16 bivalent vaccine against HPV 16 and 18, was licensed by the Chinese Food and  
17 Drug Administration in Dec 2019 and priced only half of Cervarix.<sup>13</sup> However, HPV  
18 vaccine coverage rate remains low. As of March 2021, there are no HPV  
19 vaccination programs in China. According to an online cross-sectional survey of  
20 4,220 female students from 136 Chinese universities in 2019, only 11% of  
21 participants reported have received HPV vaccine.<sup>14</sup> An even lower HPV  
22 vaccination coverage level (3.6% among females, 1.9% among males) was found  
23 in another online survey of college students in 2019.<sup>15</sup> The low rate of HPV  
24 vaccination is attributable to many causes, including late introduction of HPV  
25 vaccines, high out-of-pocket costs, lack of awareness, and misunderstandings  
26 about HPV and HPV vaccines among the public.<sup>15 16</sup>  
27  
28  
29  
30  
31  
32  
33  
34  
35  
36  
37  
38  
39  
40  
41  
42  
43  
44  
45

46 Cost-effectiveness analysis is widely used to evaluate the public health and  
47 economic value of health interventions and policies. A number of systematic  
48 reviews have assessed cost-effectiveness models evaluating HPV vaccination  
49 programs across different policy settings.<sup>4 17-19</sup> However, none of them have  
50 focused on Chinese context. Although most suggested that HPV vaccination  
51  
52  
53  
54  
55  
56  
57  
58  
59  
60

1  
2  
3 programs were likely to be cost-effective in many settings, some reached  
4  
5 discordant conclusions. Many contextual and methodological factors may affect  
6  
7 the estimated cost-effectiveness of HPV vaccination, such as baseline risk of HPV  
8  
9 infection, uptake of cervical cancer screening and treatment, analytical perspective,  
10  
11 model design, cost of vaccine, vaccine efficacy and duration of protection, and  
12  
13 comparison strategies.<sup>19-21</sup> Therefore, caution should be taken when interpreting  
14  
15 or extending these study findings and when developing new economic models.  
16  
17 Given the increasing awareness of HPV and availability of HPV vaccines (more  
18  
19 options and lower price) among the public, a targeted review of latest cost-  
20  
21 effectiveness models of HPV vaccination in the setting of China will be of  
22  
23 substantial value for public health policy making. Furthermore, an understanding  
24  
25 of the range of methods and assumptions used in analyzing the cost-effectiveness  
26  
27 of HPV vaccination can help guide future modeling development efforts.  
28  
29  
30  
31

32  
33 We executed a systematic review of published cost-effectiveness studies of HPV  
34  
35 vaccination in China. We comprehensively compared differences in cost-  
36  
37 effectiveness results of various HPV vaccination programs alone, in addition to, or  
38  
39 in combination with other cervical cancer prevention interventions as a result of  
40  
41 various modeling methods, designs and assumptions.  
42  
43  
44  
45  
46  
47  
48  
49  
50  
51  
52  
53  
54  
55  
56  
57  
58  
59  
60

## Methods

### *Search Strategy*

We performed a systematic review of literature published in English and Chinese following the PRISMA guidelines<sup>22</sup> for reporting of systematic reviews (Supplementary Appendix Table S1). The systematic literature search was conducted in databases MEDLINE (PubMed), and EMBASE for articles in English, as well as in databases China National Knowledge Infrastructure (CNKI) and Wanfang Data for articles in Chinese. We developed search terms using a combination of the following keywords: 'HPV/cervical cancer', 'vaccine', 'cost-effectiveness' and 'China' (see Supplementary Appendix Table S2, S3 for detailed search strategies). Corresponding key terms in Chinese were used in searching Chinese databases. Our searches covered all published literature up to our last search on January 2, 2021 with no limitations on publication date.

### *Selection Criteria*

Cost-effectiveness studies fulfilling the following selection criteria were included in review: (1) studies focusing on HPV vaccination interventions explicitly, alone or in combination with other interventions; (2) studies analyzing the cost-effectiveness of HPV vaccination using a modeling approach, excluding those where costs were not assessed or using a non-modeling approach; (3) studies conducted in the setting of China (including the special administrative regions of Hong Kong and Macau), excluding those examining a broader context where China was only a subregion in the analysis; (4) studies published as full-length original research

1  
2  
3 articles, excluding conference abstracts and commentaries, to ensure sufficient  
4  
5 details were provided (in the manuscript or supplementary appendix) for the  
6  
7 information required for this review.  
8  
9

### 10 *Data Extraction and Analysis*

11  
12  
13 Information pertaining to the cost-effectiveness results and different contextual and  
14  
15 methodological factors aforementioned that might influence cost-effectiveness  
16  
17 results was extracted for each selected study. These factors were generally  
18  
19 grouped in four categories: (1) study design, including both model structural design  
20  
21 and analytical design; (2) HPV vaccine, such as type, efficacy, price and other  
22  
23 assumptions; (3) HPV vaccination strategies compared and evaluation approach;  
24  
25 and (4) uncertainty analysis and study quality. Data extraction was independently  
26  
27 performed by two reviewers (WS and XC) and any differences were resolved with  
28  
29 a third reviewer (HW or XZ). For articles published in Chinese, data extraction was  
30  
31 conducted in the original language and translated into English for analysis.  
32  
33  
34  
35  
36

37 We converted cost-effectiveness results and unit cost for vaccine from all studies  
38  
39 in different currencies and years to 2021 USD according to the Consumer Price  
40  
41 Index Inflation and USD/CNY exchange rate in January 2021 (1USD=6.5CNY).  
42  
43 For studies where the currency year was not stated, we assumed it to be the year  
44  
45 of the study's publication. We also provided an assessment of the reviewed  
46  
47 economic evaluations using the Consensus on Health Economic Criteria (CHEC)-  
48  
49 list<sup>23</sup> to determine the percentage of checklist items (a total of 19) that each study  
50  
51 met as a score for study quality. Given the heterogeneity in modeling designs and  
52  
53 methods, study population (e.g., girls/women of different ages), interventions (e.g.,  
54  
55  
56  
57  
58  
59  
60

1  
2  
3 type of vaccine), health outcomes, comparator strategies, as well as some  
4 practical challenges (e.g., no sample size for weight assignment), a meta-analysis  
5 is rarely feasible for cost-effectiveness outcomes and thus was not performed in  
6 this study.<sup>24</sup>  
7  
8  
9  
10  
11

### 12 *Patient and Public Involvement statement*

13  
14  
15  
16 Neither patients nor the public were involved in this review.  
17

### 18 *Protocol Registration*

19  
20  
21  
22 This review was not previously registered.  
23  
24  
25  
26  
27  
28  
29  
30  
31  
32  
33  
34  
35  
36  
37  
38  
39  
40  
41  
42  
43  
44  
45  
46  
47  
48  
49  
50  
51  
52  
53  
54  
55  
56  
57  
58  
59  
60

## Results

Figure 1 presents a flow diagram of the study search and selection process. A total of 136 articles (69 in English and 67 in Chinese) were identified after removing the duplicates (N=78). Following screening of titles and abstracts, 35 full text articles were evaluated, among which 14 met the selection criteria (ten in English and four in Chinese) and were included for review.<sup>13 25-37</sup> Of these 14 included studies, all were published after 2010 and 12 after 2016 (the year when the first HPV vaccine was licensed to use) (Table 1). Most studies evaluated HPV vaccination at the national level (8/14), as opposed to focusing on one province (4/14) or city (2/14). All studies except one (in Hong Kong) were conducted in the setting of mainland China.

### *Study Design*

The majority of studies (13/14) adopted a cohort-based model that stratifies the study population into groups according to each individual's characteristics and health state, whereas only one used an individual-based model (Table 1). In addition to the susceptible and death states, most models considered a similar set of disease states, including different stages of cervical intraepithelial neoplasia/squamous intraepithelial lesion and cervical cancer. Three studies included additional states for HPV infection (stratified by risk level) prior to developing cervical intraepithelial neoplasia, and only two also accounted for genital wart as possible consequence of HPV infection. Although HPV is an infectious disease that is transmitted through sexual contacts, dynamic models that capture changing risk of infection (as a function the number of infectious individuals

1  
2  
3 in the population at a given time point)<sup>38</sup> were only used in 4/14 studies. The study  
4  
5 population simulated in each model were in line with the type of model used, where  
6  
7 population of both males and females were considered all in dynamic models to  
8  
9 construct transmission dynamics and potential herd immunity (other models  
10  
11 considered females only). The majority of models assessed (12/14) considered a  
12  
13 lifetime (or 100-year) time horizon to capture all possible long-term benefits and  
14  
15 consequences of alternative interventions. Only eight models explicitly described  
16  
17 the cycle length used in the model simulation, among which six used a yearly cycle  
18  
19 and two used a monthly cycle. Although a shorter cycle may better capture the  
20  
21 continuous-time reality and incidence of HPV infection during the period,<sup>39</sup> yearly  
22  
23 cycles may have limited impact on biasing cost-effectiveness results given the long  
24  
25 incubation period but can help reduce computation time. In estimating relevant  
26  
27 costs, over half studies (7/12) framed their analysis from the perspective of  
28  
29 healthcare sector/payer, two from the perspective of government, and only three  
30  
31 adopted a broader societal perspective, whereas two did not explicitly report their  
32  
33 perspectives. Out of the 14 studies, 11 used utility-based measure for health  
34  
35 outcomes, such as quality-adjusted life years (QALYs) and disability-adjusted life  
36  
37 year (DALYs), while the remaining estimated health benefits in the unit of life year  
38  
39 saved or death averted. A 3% discounting rate was universally applied in all studies  
40  
41 (except one whose discounting rate was unreported). Model calibration and  
42  
43 validation are both recommended by modeling guidelines and are critical steps to  
44  
45 establish the credibility and reliability of economic models against empirical data.<sup>40</sup>  
46  
47  
48  
49  
50  
51  
52  
53  
54  
55  
56  
57  
58  
59  
60



1  
2  
3 4<sup>1</sup> However, only nine studies incorporated either calibration or validation (two  
4 performed both) in their analysis.  
5  
6  
7

### 8 *HPV Vaccine*

9

10  
11 The type of HPV vaccine modeled and pertaining features and assumptions varied  
12 across different studies (Table 2). All studies focused on the vaccination of females  
13 only. While in most studies (12/14) vaccination was considered to be implemented  
14 among preadolescent girls under age 18 (before sexual debut); two studies  
15 focused on vaccination at the age of 18-25, one examined HPV vaccination at  
16 different ages between 12-55, and one also considered expanded catch-up  
17 programs among females aged 16-39 (the primary program still focused on  
18 preadolescent girls). Different types of vaccine were considered in different studies:  
19 eight studies focused on a bivalent vaccine, one on a quadrivalent vaccine, one on  
20 a nonavalent vaccine, two compared all these three types in one study, while two  
21 did not specify the valence of vaccine. Three-dose schedule was considered in  
22 nine studies; the remaining either assumed a two-dose schedule or did not report  
23 required doses. Although most models derived estimates for vaccine efficacy  
24 against cervical cancer and other HPV-related disease states from real-world data  
25 (clinical trials or observational studies), a few studies (5/14) assumed a 100%  
26 vaccine efficacy, which might result in possible overestimation for the impact and  
27 cost-effectiveness of HPV vaccine. Regarding vaccination coverage for the  
28 modeled interventions, half studies assumed a 70% coverage in their primary  
29 analysis (which may vary in sensitivity analysis), following by a coverage level of  
30 100% (3/14), 80% (1/14), 50% (1/14) and 20% (1/14), while one aimed to explore  
31  
32  
33  
34  
35  
36  
37  
38  
39  
40  
41  
42  
43  
44  
45  
46  
47  
48  
49  
50  
51  
52  
53  
54  
55  
56  
57  
58  
59  
60

1  
2  
3 different coverage levels (25%, 50%, 75%). Most studies (13/14) assumed lifelong  
4 vaccine protection (in which one also explored other durations of protection) while  
5 only one considered a waning of immunity over time. Cost of vaccination, including  
6 medical cost for multiple doses and relevant administration cost, varied between  
7 studies on different types of vaccine ranging from 54.2 to 663 USD. Most (8/14)  
8 chose a cost between 300-500 USD. The first domestic vaccine was analyzed in  
9 Zou et al.<sup>13</sup> study that was priced at 99.8 USD per vaccination (in 2019 USD).

### 10 11 12 13 14 15 16 17 18 19 20 *Cost-effectiveness of HPV Vaccination Strategies*

21  
22  
23 Despite no established cost-effectiveness threshold in China, almost all studies  
24 used the heuristic cost-effectiveness threshold proposed by the WHO based on  
25 local gross domestic product (GDP) per capita, even though two studies did not  
26 use a utility-based measure for health outcomes (Table 3). The only exception was  
27 one that used an extended cost-effectiveness framework whose primary outcome  
28 was not incremental cost-effectiveness ratio (and thus did not specify the  
29 threshold). Various HPV vaccination strategies were assessed in the reviewed  
30 studies. Eight studies examined the impact and cost-effectiveness of HPV  
31 vaccination programs incremental to either existing screening programs or  
32 opportunistic vaccination programs or none at all, among which three stratified  
33 their analysis by different vaccination coverage levels, different ages of vaccination,  
34 and different income levels of target population. Although these eight studies  
35 sought to address slightly different study questions, they appeared to reach a  
36 consistent conclusion that HPV vaccination was cost-effective. One study  
37 examining the effect of vaccination age showed that vaccination was cost-effective

1  
2  
3 at any age under 23 years in rural and any age under 25 years in urban areas.  
4  
5 One study compared the value of nonavalent vaccine to quadrivalent and bivalent  
6 vaccine for the prevention of cervical cancer and found it not cost-effective unless  
7  
8 the nonavalent vaccine could be priced lower than 550 and 450 USD for the full  
9  
10 doses (as opposed to 663 USD used in the study, in 2017 USD), respectively. The  
11  
12 other five studies, on the other hand, analyzed combination strategies for HPV  
13  
14 vaccination with various HPV screening methods or frequencies, three of which  
15  
16 also created cost-effective frontiers to identify an optimal strategy. However,  
17  
18 findings of these studies were less consistent, and sometimes contradictory.  
19  
20 Canfell et al. study examined the association between cost-effectiveness of HPV  
21  
22 vaccination strategies (in combination with screening interventions) and cost per  
23  
24 vaccinated girl (CGV), and found strategies involving vaccination would be cost-  
25  
26 effective only at CVGs of 50–54 USD or less (if  $CVG > 54$  USD, screening-only  
27  
28 strategies would be more cost-effective).<sup>25</sup> Ma et al. study found that the addition  
29  
30 of universal vaccination to screening programs was not cost-effective unless with  
31  
32 at least a 50% reduction on the vaccine price (from 451 to 226 USD).<sup>32</sup> The optimal  
33  
34 combination of vaccine type and screening method identified in Mo et al. study was  
35  
36 nonavalent vaccination and visual inspection with acetic acid (VIA).<sup>33</sup> However,  
37  
38 another finding of this study was that quadrivalent and nonavalent vaccine both  
39  
40 denominated bivalent vaccine regarding the cost-effectiveness, conversely to  
41  
42 Jiang et al.'s results.<sup>27</sup> Although Song et al. showed that the combination of  
43  
44 vaccination at age 15 and screening twice in a lifetime (at age 35 and 45) was  
45  
46 cost-effective compared to no intervention, but it was not cost-effective when  
47  
48  
49  
50  
51  
52  
53  
54  
55  
56  
57  
58  
59  
60

1  
2  
3 compared to only screening twice in a lifetime (optimal strategy).<sup>35</sup> Zou et al. was  
4 the only study that included the domestic vaccine in their analysis (with lower price  
5 than the imported vaccines) and they identified the optimal strategy to be  
6 vaccination with careHPV screening once every five years.<sup>13</sup> They also determined  
7 that adding vaccination to screening programs would be consistently more cost-  
8 effective than screening alone when vaccination cost could be lower than 50 USD.  
9  
10  
11  
12  
13  
14  
15  
16

### 17 *Uncertainty Analysis and Study Quality*

18  
19  
20 To assess model uncertainty, many studies explicitly incorporated sensitivity  
21 analysis (SA), including one-way SA (in ten studies), two-way SA (in one study),  
22 and probabilistic SA (in five studies) (Table 3, some studies incorporated multiple  
23 types of SA). Among those performed one-way SA, the parameters that cost-  
24 effectiveness results were most sensitive to included discounting rate, cost of  
25 vaccine, and vaccine efficacy. Quality assessment of the reviewed studies against  
26 the CHEC-list suggested that most of them upheld a high level of quality in  
27 reporting, with an average score of 85 and ranging from 53 to 100 (where 100  
28 represented 100% of checklist items were complied with) (Supplementary  
29 Appendix Table S4).  
30  
31  
32  
33  
34  
35  
36  
37  
38  
39  
40  
41  
42  
43  
44  
45  
46  
47  
48  
49  
50  
51  
52  
53  
54  
55  
56  
57  
58  
59  
60

## Discussion

To our knowledge, this study provides the first systematic review on the cost-effectiveness of introducing HPV vaccination programs in the setting of China. In this review, we performed a comprehensive and in-depth assessment of 14 model-based cost-effectiveness studies regarding their findings, study design, and assumptions for HPV vaccine and vaccination programs. Despite considerable heterogeneity in the methodologies used in different models, our findings show that HPV vaccination is estimated to have substantial potential to be a cost-effective addition to existing/other cervical cancer prevention interventions in China. However, the cost-effectiveness of HPV vaccination is likely to depend on considerations such as cost of vaccination, age of vaccination, vaccine efficacy, as well as complementary and/or competing strategies (e.g., cervical cancer screening).

Among all the influential factors, cost of vaccine was consistently identified as a key determinant for the cost-effectiveness of HPV vaccination. Cost estimates varied considerably across studies for different vaccines and years; acquiring more reliable evidence on vaccine cost will help reduce uncertainty surrounding cost-effectiveness results. Six of the reviewed studies performed additional threshold analysis to determine the cost at which adding HPV vaccination to cervical cancer screening programs would become/remain (more) cost-effective. While three studies suggested disparate thresholds for the cost per fully vaccinated girl/woman ranging from 226 to 689 USD, findings of the other three were more consistent showing a lower threshold of 50 USD. The Zou et al. study assessed the first

1  
2  
3 domestic bivalent HPV vaccine at a unit cost of 99.8 USD, substantially cheaper  
4 than the imported vaccines.<sup>13</sup> Given more domestic vaccines under development  
5 and growing initiatives to include HPV vaccine into national immunization program,  
6 further reduction in vaccine price and improved cost-effectiveness is attainable in  
7 the foreseeable future. Furthermore, some other characteristics and assumptions  
8 of HPV vaccine and vaccination programs were also found to be associated with  
9 increased cost-effectiveness of HPV vaccination, such as higher vaccine efficacy,  
10 longer duration of vaccine immunity, younger age being vaccinated, and higher  
11 vaccination coverage (although most models did not account for herd immunity).  
12  
13

14 Findings of the reviewed studies were generally consistent with other systematic  
15 reviews focusing on cost-effectiveness of HPV vaccination in low- and middle-  
16 income countries.<sup>19 42 43</sup> Most of these studies concluded that vaccination was likely  
17 to be cost-effective, particularly in contexts without organized cervical cancer  
18 screening programs. On the contrary, HPV vaccination, regardless of the type of  
19 vaccine and modeling design, was more consistently found in high-income  
20 countries,<sup>44 45</sup> due in large to higher willingness to pay thresholds and vaccine  
21 uptake. Based on the summary of evidence, a few recommendations may be  
22 provided for implementing HPV vaccination programs to enhance its cost-  
23 effectiveness. HPV vaccine is most recommended for routine vaccination for girls  
24 at younger age (before 16) while will still remain valuable for women of older age  
25 (under 23 years in rural and under 25 years in urban areas) according to one  
26 reviewed study that explored different vaccination ages.<sup>29</sup> The US Centers for  
27 Disease Control and Prevention recommended vaccination for everyone (including  
28  
29  
30  
31  
32  
33  
34  
35  
36  
37  
38  
39  
40  
41  
42  
43  
44  
45  
46  
47  
48  
49  
50  
51  
52  
53  
54  
55  
56  
57  
58  
59  
60

1  
2  
3 men) at age 11 through age 26 years.<sup>46</sup> In the United Kingdom, men and women  
4  
5 aged 12 to 13 years are routinely offered HPV vaccination and can access free  
6  
7 vaccination up until their 25<sup>th</sup> birthday.<sup>47</sup> Regarding the type of vaccine for  
8  
9 recommendation, two studies reached contradicting conclusions about the relative  
10  
11 cost-effectiveness between nonavalent, quadrivalent and bivalent vaccines. This  
12  
13 difference is likely attributable to disparate costs applied for different vaccines in  
14  
15 the two models. In Jiang et al.'s model,<sup>27</sup> nonavalent vaccine was assumed to be  
16  
17 60% and 116% more expensive than quadrivalent and bivalent vaccines,  
18  
19 respectively, while it costed only 11% more than the other two vaccines in Mo et  
20  
21 al.'s study.<sup>33</sup> Future investigations of different vaccines and their pricing, efficacy  
22  
23 and population impacts may be required for more rigorous recommendation  
24  
25 strategies. Meanwhile, the reviewed studies demonstrated strong synergies  
26  
27 between HPV vaccination and cervical cancer screening that the greatest public  
28  
29 health benefits, and sometimes also the optimal strategy, could be achieved only  
30  
31 when these two interventions were implemented simultaneously. However, in  
32  
33 identifying the optimal combination strategies, two studies indicated that screening  
34  
35 alone might outperform strategies with the addition of HPV vaccination, while there  
36  
37 was less consistency regarding the screening methods (pap, VIA or careHPV test)  
38  
39 and testing frequencies. Given current low uptake of screening in China,  
40  
41 establishing appropriate strategies to substantially expand cervical cancer  
42  
43 screening should be prioritized prior to or simultaneously with implementing HPV  
44  
45 vaccination programs.  
46  
47  
48  
49  
50  
51  
52  
53  
54  
55  
56  
57  
58  
59  
60

1  
2  
3 From the methodological point of view, a few recommended model design and  
4 practice may be highlighted for future modeling efforts. First, a key finding of this  
5 review was that the majority of reviewed studies applied a static model in  
6 simulating HPV infection that was unable to capture potential herd immunity when  
7 HPV vaccination reached a high level of coverage. According to the modeling  
8 guideline, dynamic design is important to consider when an intervention affects a  
9 pathogen's ecology or when the intervention affects disease transmission.<sup>38</sup>  
10 Incorporating dynamic design will ensure capturing the indirect effects of HPV  
11 vaccination that arise from averted infections, i.e., individuals not reached by the  
12 vaccination program can still benefit by experiencing a lower infection risk.  
13 However, applying such a dynamic model may require modeling the population of  
14 men (who are non-recipients of HPV vaccine) as well as additional model  
15 parameters. Second, cost-effectiveness models are built upon various input data  
16 and assumptions and are inevitably subject to uncertainty. Handling model  
17 uncertainty is important and can help assess the robustness of model results and  
18 enhance our confidence in a chosen course of action. Model calibration and SA  
19 are both recommended practices<sup>40</sup> to address uncertainty but were not performed  
20 in all models (calibration in 7/14 models, sensitivity analysis in 12/14 models). For  
21 the conduct of uncertainty analysis, we also recommend carefully choosing  
22 uncertainty ranges for parameters to meaningfully reflect their plausible values  
23 (rather than imposing an arbitrarily range) and explicitly reporting the rationale.  
24 Third, although cervical cancer is the primary disease following HPV infection, it is  
25 also important to account for other possible consequences and diseases, without  
26  
27  
28  
29  
30  
31  
32  
33  
34  
35  
36  
37  
38  
39  
40  
41  
42  
43  
44  
45  
46  
47  
48  
49  
50  
51  
52  
53  
54  
55  
56  
57  
58  
59  
60



1  
2  
3 which the impact and cost-effectiveness of HPV vaccination may be  
4  
5 underestimated.  
6  
7

8  
9 Our review may have some limitations. First, we did not attempt to exhaustively  
10 include all aspects and assumptions of a model in this review (such as utility  
11 estimates, force of infection, disease progression) but only the ones we believed  
12 were most influential on cost-effectiveness results. Second, the quality of evidence  
13 used to support a model is another central factor in ensuring credibility and  
14 reliability of model inferences but was not assessed in this review. Third, we were  
15 unable to perform a meta-analysis due to the variability across studies in the  
16 strategies evaluated and outcomes reported. Nevertheless, all studies have  
17 compared the estimated cost-effectiveness with the WHO-CHOICE cost-  
18 effectiveness benchmark using local (national, provincial, or city-level) GDP per  
19 capita, providing a consistent criterion across studies.  
20  
21  
22  
23  
24  
25  
26  
27  
28  
29  
30  
31  
32  
33

34 The body of evidence from this systematic review of cost-effectiveness modeling  
35 studies on HPV vaccine suggests that implementing HPV vaccination programs  
36 for young girls is likely warranted in China and should be paired with expansion of  
37 cervical cancer screening to maximize their impact. Cost of vaccination was found  
38 to significantly affect the cost-effectiveness estimates and policy recommendations.  
39 As domestic vaccines become available and their prices continue to drop, HPV  
40 vaccination will become a more viable option in designing cervical cancer  
41 prevention programs. Future modeling studies following established best-practice  
42 standards are needed to reduce decision uncertainty and definitively establish the  
43 cost-effectiveness of HPV vaccination in combination with screening programs.  
44  
45  
46  
47  
48  
49  
50  
51  
52  
53  
54  
55  
56  
57  
58  
59  
60

## Contributors

WS and TC conceptualized the study. WS, XC conducted data collection. WS, HW and XZ performed data analyses. WS and TC wrote the first draft of the article. XC, HW and XZ helped to interpret results and critically revise the manuscript. All authors approved the final draft.

## Funding

This work was supported by the State Administration of Traditional Chinese Medicine of the People's Republic of China (grant number: GZY-GCS-2017-36). The funder had no role in study design, data analysis, or decision to publish.

## Competing interests

The authors have no conflicts of interest to declare.

## Data sharing statement

There is no additional unpublished data associated with this study. All data are available in the manuscript and supplementary appendix.

## Ethical Approval Statement

Not applicable

## References

1. Zhu B, Liu Y, Zuo T, et al. The prevalence, trends, and geographical distribution of human papillomavirus infection in China: The pooled analysis of 1.7 million women. *Cancer medicine* 2019;8(11):5373-85.
2. Li K, Li Q, Song L, et al. The distribution and prevalence of human papillomavirus in women in mainland China. *Cancer* 2019;125(7):1030-37.
3. Bruni L, Albero G, Serrano B, et al. ICO/IARC Information Centre on HPV and Cancer (HPV Information Centre). Human Papillomavirus and Related Diseases in China. Summary Report 17 June 2019 2019 [Available from: <https://hpvcentre.net/statistics/reports/CHN.pdf> accessed March 1 2021.
4. Gervais F, Dunton K, Jiang Y, et al. Systematic review of cost-effectiveness analyses for combinations of prevention strategies against human papillomavirus (HPV) infection: a general trend. *BMC public health* 2017;17(1):1-18.
5. Bansal A, Singh MP, Rai B. Human papillomavirus-associated cancers: A growing global problem. *International Journal of Applied and Basic Medical Research* 2016;6(2):84.
6. World Health Organization. Global strategy to accelerate the elimination of cervical cancer as a public health problem. Geneva: World Health Organization 2020 [Available from: <https://www.who.int/publications/i/item/9789240014107> accessed March 1, 2021.
7. Markowitz LE, Tsu V, Deeks SL, et al. Human papillomavirus vaccine introduction—the first five years. *Vaccine* 2012;30:F139-F48.
8. Mix JM, Van Dyne EA, Saraiya M, et al. Assessing Impact of HPV Vaccination on Cervical Cancer Incidence among Women Aged 15–29 Years in the United States, 1999–2017: An Ecologic Study. *Cancer Epidemiology and Prevention Biomarkers* 2021;30(1):30-37.
9. Steben M, Thompson MT, Rodier C, et al. A review of the impact and effectiveness of the quadrivalent human papillomavirus vaccine: 10 years of clinical experience in Canada. *Journal of Obstetrics and Gynaecology Canada* 2018;40(12):1635-45.
10. Leval A, Herweijer E, Ploner A, et al. Quadrivalent human papillomavirus vaccine effectiveness: a Swedish national cohort study. *Journal of the National Cancer Institute* 2013;105(7):469-74.
11. Kjaer SK, Nygård M, Sundström K, et al. Final analysis of a 14-year long-term follow-up study of the effectiveness and immunogenicity of the quadrivalent human papillomavirus vaccine in women from four Nordic countries. *EClinicalMedicine* 2020;23:100401.
12. Chen R, Wong E. The feasibility of universal HPV vaccination program in Shenzhen of China: a health policy analysis. *BMC public health* 2019;19(1):1-10.
13. Zou Z, Fairley CK, Ong JJ, et al. Domestic HPV vaccine price and economic returns for cervical cancer prevention in China: a cost-effectiveness analysis. *The Lancet Global Health* 2020;8(10):e1335-e44.
14. You D, Han L, Li L, et al. Human papillomavirus (HPV) vaccine uptake and the willingness to receive the HPV vaccination among female college students in China: a multicenter study. *Vaccines* 2020;8(1):31.
15. Deng C, Chen X, Liu Y. Human papillomavirus vaccination: coverage rate, knowledge, acceptance, and associated factors in college students in mainland China. *Human Vaccines & Immunotherapeutics* 2020:1-8.
16. Ji M, Huang Z, Ren J, et al. Chinese Vaccine Providers' Perspectives on the HPV Vaccine. *Global pediatric health* 2020;7:2333794X20967592.

17. Seto K, Marra F, Raymakers A, et al. The cost effectiveness of human papillomavirus vaccines. *Drugs* 2012;72(5):715-43.
18. Pink J, Parker B, Petrou S. Cost effectiveness of HPV vaccination: a systematic review of modelling approaches. *Pharmacoeconomics* 2016;34(9):847-61.
19. Fesenfeld M, Hutubessy R, Jit M. Cost-effectiveness of human papillomavirus vaccination in low and middle income countries: a systematic review. *Vaccine* 2013;31(37):3786-804.
20. Ekwunife OI, O'Mahony JF, Grote AG, et al. Challenges in cost-effectiveness analysis modelling of HPV vaccines in low-and middle-income countries: a systematic review and practice recommendations. *Pharmacoeconomics* 2017;35(1):65-82.
21. Natunen K, Lehtinen T, Torvinen S, et al. Cost-effectiveness of HPV-vaccination in medium or low income countries with high cervical cancer incidence—a systematic review. *Journal of Vaccines and Vaccination* 2013;4(1):2-10.
22. Moher D, Liberati A, Tetzlaff J, et al. Preferred reporting items for systematic reviews and meta-analyses: the PRISMA statement. *Int J Surg* 2010;8(5):336-41.
23. Evers S, Goossens M, De Vet H, et al. Criteria list for assessment of methodological quality of economic evaluations: Consensus on Health Economic Criteria. *International journal of technology assessment in health care* 2005;21(2):240-45.
24. Shields GE, Elvidge J. Challenges in synthesising cost-effectiveness estimates. *Systematic Reviews* 2020;9(1):1-7.
25. Canfell K, Shi J-F, Lew J-B, et al. Prevention of cervical cancer in rural China: evaluation of HPV vaccination and primary HPV screening strategies. *Vaccine* 2011;29(13):2487-94.
26. Choi HC, Jit M, Leung GM, et al. Simultaneously characterizing the comparative economics of routine female adolescent nonavalent human papillomavirus (HPV) vaccination and assortativity of sexual mixing in Hong Kong Chinese: a modeling analysis. *BMC medicine* 2018;16(1):1-13.
27. Jiang Y, Ni W, Wu J. Cost-effectiveness and value-based prices of the 9-valent human papillomavirus vaccine for the prevention of cervical cancer in China: an economic modelling analysis. *BMJ open* 2019;9(11):e031186.
28. Levin CE, Sharma M, Olson Z, et al. An extended cost-effectiveness analysis of publicly financed HPV vaccination to prevent cervical cancer in China. *Vaccine* 2015;33(24):2830-41.
29. Liu Y-J, Zhang Q, Hu S-Y, et al. Effect of vaccination age on cost-effectiveness of human papillomavirus vaccination against cervical cancer in China. *BMC cancer* 2016;16(1):1-11.
30. Luo P, Zhang C, Liy D. Rapid evaluation of health economics of bivalent HPV vaccination in Wuhan based on prime tool. *China Pharmacist* 2020;23(6):1115-8.
31. Luo Y, He H, Tang X, et al. Cost-effectiveness of 2-dose human papillomavirus vaccination for 12-year-old girls in Zhejiang Province: implications for China's expanded program on immunization. *Human vaccines & immunotherapeutics* 2020;16(7):1623-29.
32. Ma X, Harripersaud K, Smith K, et al. Modeling the epidemiological impact and cost-effectiveness of a combined schoolgirl HPV vaccination and cervical cancer screening program among Chinese women. *Human Vaccines & Immunotherapeutics* 2020:1-10.
33. Mo X, Tobe RG, Wang L, et al. Cost-effectiveness analysis of different types of human papillomavirus vaccination combined with a cervical cancer screening program in mainland China. *BMC infectious diseases* 2017;17(1):1-12.

- 1
  - 2
  - 3
  - 4
  - 5
  - 6
  - 7
  - 8
  - 9
  - 10
  - 11
  - 12
  - 13
  - 14
  - 15
  - 16
  - 17
  - 18
  - 19
  - 20
  - 21
  - 22
  - 23
  - 24
  - 25
  - 26
  - 27
  - 28
  - 29
  - 30
  - 31
  - 32
  - 33
  - 34
  - 35
  - 36
  - 37
  - 38
  - 39
  - 40
  - 41
  - 42
  - 43
  - 44
  - 45
  - 46
  - 47
  - 48
  - 49
  - 50
  - 51
  - 52
  - 53
  - 54
  - 55
  - 56
  - 57
  - 58
  - 59
  - 60
34. Qie S. Pharmacoeconomic evaluation of cervical cancer vaccine in the prevention of cervical cancer in Chinese women aged 18-25. *Journal of Clinical Medical* 2017;4(48):9342-5.
35. Song X, Zhao Q, Zhou Z, et al. Health economic evaluation of bivalent human papilloma virus vaccine in China: based on the dynamic model. *Zhonghua yu Fang yi xue za zhi [Chinese Journal of Preventive Medicine]* 2017;51(9):814-20.
36. Sun Y, Liu Y, Liu T. Economic evaluation of human papillomavirus vaccine versus Chinese women aged 18 to 25 for treating cervical cancer. *Chinese Journal of Evidence-Based Medicine* 2017;17(1):102-7.
37. Zhang Q, Liu Y-J, Hu S-Y, et al. Estimating long-term clinical effectiveness and cost-effectiveness of HPV 16/18 vaccine in China. *BMC cancer* 2016;16(1):1-12.
38. Pitman R, Fisman D, Zaric GS, et al. Dynamic transmission modeling: a report of the ISPOR-SMDM Modeling Good Research Practices Task Force Working Group–5. *Medical decision making* 2012;32(5):712-21.
39. O’Mahony JF, Newall AT, van Rosmalen J. Dealing with time in health economic evaluation: methodological issues and recommendations for practice. *Pharmacoeconomics* 2015;33(12):1255-68.
40. Briggs AH, Weinstein MC, Fenwick EA, et al. Model parameter estimation and uncertainty: a report of the ISPOR-SMDM Modeling Good Research Practices Task Force--6. *Value in health : the journal of the International Society for Pharmacoeconomics and Outcomes Research* 2012;15(6):835-42. doi: 10.1016/j.jval.2012.04.014
41. Eddy DM, Hollingworth W, Caro JJ, et al. Model transparency and validation: a report of the ISPOR-SMDM Modeling Good Research Practices Task Force--7. *Value in health : the journal of the International Society for Pharmacoeconomics and Outcomes Research* 2012;15(6):843-50. doi: 10.1016/j.jval.2012.04.012
42. Silas OA, Achenbach CJ, Murphy RL, et al. Cost effectiveness of human papilloma virus vaccination in low and middle income countries: a systematic review of literature. *Expert review of vaccines* 2018;17(1):91-98.
43. Okeah BO, Ridyard CH. Factors influencing the cost-effectiveness outcomes of HPV vaccination and screening interventions in low-to-middle-income countries (LMICs): a systematic review. *Applied health economics and health policy* 2020;18:641-54.
44. Marra F, Cloutier K, Oteng B, et al. Effectiveness and cost effectiveness of human papillomavirus vaccine. *Pharmacoeconomics* 2009;27(2):127-47.
45. Mahumud RA, Alam K, Keramat SA, et al. Cost-effectiveness evaluations of the 9-Valent human papillomavirus (HPV) vaccine: Evidence from a systematic review. *PloS one* 2020;15(6):e0233499.
46. Meites E, Szilagyi PG, Chesson HW, et al. Human papillomavirus vaccination for adults: updated recommendations of the Advisory Committee on Immunization Practices: Wiley Online Library, 2019.
47. Government of Canada. Overview of national data on opioid-related harms and deaths. <https://www.canada.ca/en/health-canada/services/substance-use/problematic-prescription-drug-use/opioids/data-surveillance-research/harms-deaths.html>. Accessed January 15, 2019. Government of Canada, 2018

1  
2  
3  
4  
5  
6  
7  
8  
9  
10  
11  
12  
13  
14  
15  
16  
17  
18  
19  
20  
21  
22  
23  
24  
25  
26  
27  
28  
29  
30  
31  
32  
33  
34  
35  
36  
37  
38  
39  
40  
41  
42  
43  
44  
45  
46  
47  
48  
49  
50  
51  
52  
53  
54  
55  
56  
57  
58  
59  
60

**Figure 1. Flow diagram of study selection**  
**Legend:** CEA: cost-effectiveness analysis

For peer review only

**Table 1. Study design of selected modeling studies**

| Reference | Year of publication | Setting                 | Model type                                                         | Disease states modelled                                                       | Study population              | Timeframe (cycle length) | Perspective       | Discount rate | Health measure  | Calibration /validation | Year of cost |
|-----------|---------------------|-------------------------|--------------------------------------------------------------------|-------------------------------------------------------------------------------|-------------------------------|--------------------------|-------------------|---------------|-----------------|-------------------------|--------------|
| Canfell   | 2011                | Shanxi Province (rural) | Cohort, Dynamic                                                    | CIN (3), cervical cancer                                                      | Males + females (of all ages) | Lifetime (1 year)        | Societal          | 3%            | Life year       | Calibration             | 2010         |
| Choi      | 2018                | Hong Kong               | Cohort dynamic (for transmission) + individual-based (for disease) | CIN (3)<br>Cervical cancer: 4 stages+ asymptomatic/symptomatic                | Males + females (10-85 years) | Lifetime (1 month)       | Societal          | 3%            | Life year, QALY | Calibration             | 2018*        |
| Jiang     | 2019                | China                   | Cohort, Static                                                     | Cervical cancer                                                               | Females of 16 years           | Lifetime (unclear)       | Healthcare payer  | 3%            | DALY            | No                      | 2017         |
| Levin     | 2015                | China                   | Individual, Static                                                 | CIN (3), cervical cancer                                                      | Females (9 years and older)   | Lifetime (1 month)       | Government        | Unclear       | Deaths averted  | Calibration             | 2009         |
| Liu       | 2016                | China (rural, urban)    | Cohort, Static                                                     | CIN (3), cervical cancer                                                      | Females of 12-55 years        | Lifetime (1 year)        | Healthcare payer  | 3%            | QALY            | Calibration, Validation | 2016*        |
| Luo P     | 2020                | Wuhan City              | Cohort, Static                                                     | Cervical cancer                                                               | Females of 12 years           | Lifetime (unclear)       | Unclear           | 3%            | DALY            | No                      | 2020*        |
| Luo Y     | 2020                | Zhejiang Province       | Cohort, Static                                                     | High-risk HPV infection<br>Low-grade SIL<br>High-grade SIL<br>Cervical cancer | Females of 12 years           | Lifetime (1 year)        | Government        | 3%            | QALY            | No                      | 2020*        |
| Ma        | 2020                | China                   | Cohort, Dynamic                                                    | HPV infection (high/low-risk)<br>CIN (3)<br>Cervical cancer<br>Genital wart   | Females (of all ages)         | 50 years (1 year)        | Unclear           | 3%            | DALY            | Calibration             | 2020         |
| Mo        | 2017                | China                   | Cohort, Static                                                     | HPV infection (high/low-risk)<br>CIN (3)<br>Cervical cancer<br>Genital wart   | Females of 12 years           | Lifetime (1 year)        | Societal          | 3%            | QALY            | Calibration             | 2015         |
| Qie       | 2017                | Zhejiang Province       | Cohort, Static                                                     | CIN (3), cervical cancer                                                      | Females of 18-25 years        | Unclear (unclear)        | Healthcare sector | 3%            | QALY            | No                      | 2017*        |
| Song      | 2017                | China                   | Cohort, Dynamic                                                    | CIN (3), cervical cancer                                                      | Males + females               | 100 years (unclear)      | Healthcare sector | 3%            | Life year       | Validation              | 2017*        |
| Sun       | 2017                | Jiangsu Province        | Cohort, Static                                                     | CIN (3), cervical cancer                                                      | Females of 18-25 years        | Lifetime (unclear)       | Healthcare sector | 3%            | QALY            | No                      | 2017*        |
| Zhang     | 2016                | China (rural, urban)    | Cohort, Static                                                     | CIN (3), cervical cancer                                                      | Females of 12 years           | Lifetime (unclear)       | Healthcare payer  | 3%            | QALY            | Validation              | 2013         |
| Zou       | 2020                | China                   | Cohort, Static                                                     | CIN (3), cervical cancer                                                      | Females of 9-14 years         | Lifetime (1 year)        | Healthcare sector | 3%            | QALY            | Calibration, Validation | 2019         |

**Legend:** \* no year of cost reported, using publication year instead. CIN (3): cervical intraepithelial neoplasia (3 stages); SIL: squamous intraepithelial lesion; QALY: quality-adjusted life year; DALY: disability-adjusted life year.



**Table 2. Model assumptions and parameters for HPV vaccine evaluated**

| Reference | Age of vaccination             | Vaccine type                           | No. of doses | Vaccine efficacy                                                                                                    | Vaccine coverage     | Duration of protection                              | Unit cost reported*                                               | Unit cost in 2021 USD (\$)                                        |
|-----------|--------------------------------|----------------------------------------|--------------|---------------------------------------------------------------------------------------------------------------------|----------------------|-----------------------------------------------------|-------------------------------------------------------------------|-------------------------------------------------------------------|
| Canfell   | 15                             | Unspecified                            | 3            | 100%                                                                                                                | 70%                  | Lifelong                                            | Varied in the analysis                                            | Varied in the analysis                                            |
| Choi      | 12                             | Nonavalent                             | 2            | 95.5% (90.0%-98.4%) for HPV-16<br>95.8% (84.1%-99.5%) for HPV-18<br>96.0% (94.4%-97.2%) for HPV-OV<br>0% for HPV/NV | 25%, 50% and 75%     | 20 years, 30 years and lifelong (various scenarios) | 284 USD                                                           | \$303.1                                                           |
| Jiang     | 16                             | Bivalent<br>Quadrivalent<br>Nonavalent | Unclear      | 100%                                                                                                                | 100%                 | Lifelong                                            | Nonavalent: 628 USD<br>Quadrivalent: 393 USD<br>Bivalent: 291 USD | Nonavalent: \$682.5<br>Quadrivalent: \$427.1<br>Bivalent: \$316.3 |
| Levin     | <12                            | Unspecified                            | 3            | 100%                                                                                                                | 70%                  | Lifelong                                            | 46 USD                                                            | \$61.1                                                            |
| Liu       | 12-55                          | Bivalent                               | 3            | 93.2% against CC<br>64.9% against CIN2/3<br>50.3% against CIN1                                                      | 70%                  | Lifelong                                            | 1954 CNY                                                          | \$333.2                                                           |
| Luo P     | 12                             | Bivalent                               | 3            | 95% (63%-100%)                                                                                                      | 100%^                | Lifelong                                            | 1999 CNY                                                          | \$308.4                                                           |
| Luo Y     | 12                             | Bivalent                               | 2            | 76.78% (40%-100%)                                                                                                   | 70%                  | Lifelong                                            | 1040 CNY                                                          | \$160.4                                                           |
| Ma        | 9-16                           | Quadrivalent                           | Unclear      | 78.9% (74.5%-82.4%)                                                                                                 | 50%                  | 5% rate of immunity waning                          | 451 USD                                                           | \$452.3                                                           |
| Mo        | 12                             | Bivalent<br>Quadrivalent<br>Nonavalent | 3            | Bivalent: 80.7% (57.5%-98.9%)<br>Quadrivalent: 81.5% (58.8%-98.2%)<br>Nonavalent: 90.8% (66.5%-100%)                | 20% (10%-100% in SA) | Lifelong                                            | Bi/Quadrivalent: 408 USD<br>Nonavalent: 452 USD                   | Bi/Quadrivalent: \$459.6<br>Nonavalent: \$509.1                   |
| Qie       | 18-25                          | Bivalent                               | 3            | 100%                                                                                                                | 80%                  | Lifelong                                            | 1842 CNY                                                          | \$308.0                                                           |
| Song      | Primary: 15<br>Expanded: 16-39 | Bivalent                               | 3            | 100%                                                                                                                | 70%                  | Lifelong                                            | 1995 CNY                                                          | \$333.6                                                           |
| Sun       | 18-25                          | Bivalent                               | 3            | 94.2% (62.7%-99.9%)                                                                                                 | 100%^                | Lifelong                                            | 2000 CNY                                                          | \$334.4                                                           |
| Zhang     | 12                             | Bivalent                               | 3            | 93.2% (78.9%-98.7%) against CC<br>64.9% (52.7%-74.9%) against CIN2/3<br>50.3% (40.2%-58.8%) against CIN1            | 70%                  | Lifelong                                            | 301 CNY                                                           | \$54.2                                                            |
| Zou       | 9-14                           | Bivalent                               | 2            | 94% (80%-99%)                                                                                                       | 70% (50-95% in SA)   | Lifelong                                            | 99.8 USD                                                          | \$104.7                                                           |

**Legend:** \* total cost per girl/woman vaccinated, including medical cost for multiple doses and other relevant costs (e.g., vaccine administration). ^ among individuals with negative screening results. CC: cervical cancer; CIN: cervical intraepithelial neoplasia; OV: other five high-risk HPV targeted by the nonavalent vaccine; NV: non-vaccine high-risk HPV; CNY: Chinese yuan; SA: sensitivity analysis.



**Table 3. Cost-effectiveness of HPV vaccination strategies**

| Reference | Intervention                                                                                                             | Comparator                                                      | ICER reported                                                    | ICER in 2021 USD (\$)                                        | Threshold                           | Conclusion                                                                                                                                                                                                                                               | Sensitivity analysis   | Most sensitive parameters                                           |
|-----------|--------------------------------------------------------------------------------------------------------------------------|-----------------------------------------------------------------|------------------------------------------------------------------|--------------------------------------------------------------|-------------------------------------|----------------------------------------------------------------------------------------------------------------------------------------------------------------------------------------------------------------------------------------------------------|------------------------|---------------------------------------------------------------------|
| Canfell   | Combination of: vaccination and different screening strategies (with different frequencies)                              | No vaccination, no screening                                    | -                                                                | -                                                            | GDP <sup>^</sup> : 3,077 USD        | Strategies involving vaccination would be cost-effective at CVGs of 50–54 USD or less, but at CVGs > 54 USD, screening-only strategies would be more cost-effective                                                                                      | One-way, probabilistic | Discounting rate<br>Cost of HPV screening<br>Duration of protection |
| Choi      | Vaccination (routine) at different coverage levels                                                                       | Opportunistic vaccination (12% coverage)                        | -                                                                | -                                                            | GDP <sup>^</sup> : 40,099 USD       | Cost-effective across all three vaccination coverage levels. Will remain cost-effective if the cost of fully vaccinating one girl is no greater than 689 646–734) USD, respectively.                                                                     | Probabilistic          | -                                                                   |
| Jiang     | Nonavalent vaccine                                                                                                       | Quadrivalent, bivalent vaccine                                  | 35,000 USD/DALY vs. quadrivalent<br>50,455 USD/DALY vs. bivalent | \$38,040/DALY vs. quadrivalent<br>\$54,837/DALY vs. bivalent | 1-3 * GDP <sup>^</sup> : 8,640 USD  | Not cost-effective compared with the quadrivalent and the bivalent vaccines. To be cost-effective, the 9-valent vaccine should be priced at \$550 and \$450 for the full doses, respectively                                                             | One-way                | Discounting rate<br>CC mortality<br>Age of vaccination              |
| Levin     | Vaccination (targeting different income groups) + screening                                                              | Screening only                                                  | 10,920 - 13,277 USD per death averted                            | \$14,504 - \$17,635 per death averted                        | -                                   | Cost-effective across all income groups. Would remain cost-effective if the cost is less than 50 USD per vaccinated girl.                                                                                                                                | One-way                | Not reported                                                        |
| Liu       | Vaccination (at different ages) + Pap test                                                                               | Pap test only                                                   | Varied by age                                                    | -                                                            | 1-3 * GDP <sup>^</sup> : 41,908 CNY | Vaccination is cost-effective at any age under 23 years in rural and any age under 25 years in urban areas. Catch-up vaccination to the age of 25 years in addition to routine vaccination in 12-year-old in both rural and urban can be cost-effective. | No                     | -                                                                   |
| Luo P     | Vaccination                                                                                                              | No vaccination                                                  | 83,496 CNY/DALY                                                  | \$12,881/DALY                                                | 1-3 * GDP <sup>^</sup> : 52,000 CNY | Very cost-effective                                                                                                                                                                                                                                      | One-way                | Discounting rate<br>Cost of vaccine<br>Cost of CC treatment         |
| Luo Y     | Vaccination                                                                                                              | No vaccination                                                  | 12,472 CNY/QALY                                                  | \$1,924/QALY                                                 | 1-3 * GDP <sup>^</sup> : 92,100 CNY | Very cost-effective                                                                                                                                                                                                                                      | One-way                | Cost of vaccine<br>Discounting rate<br>QALY estimates               |
| Ma        | Combination of: universal vaccination (coverage : 0%-90%) and screening (coverage: 20%-70%)                              | Status quo (0% vaccination coverage and 20% screening coverage) | -                                                                | -                                                            | 1-3 * GDP <sup>^</sup> : 10,264 USD | The addition of universal vaccination to screening programs is not cost-effective. The vaccine requires at least a 50% price reduction to be cost-effective.                                                                                             | Probabilistic          | -                                                                   |
| Mo        | Combination of: different types of vaccination and screening methods                                                     | No vaccination, no screening                                    | -                                                                | -                                                            | 1-3 * GDP <sup>^</sup> : 7,960 USD  | Optimal: nonavalent vaccination + VIA screening. Quadrivalent/nonavalent vaccine, in combination with current screening strategies, is highly cost-effective and dominates bivalent vaccine                                                              | One-way                | Vaccine efficacy<br>Cost of vaccine<br>Discounting rate             |
| Qie       | Vaccination + Pap test                                                                                                   | Pap test only                                                   | 43,490 CNY/QALY                                                  | \$7,272/QALY                                                 | 1-3 * GDP <sup>^</sup> : 52,000 CNY | Very cost-effective                                                                                                                                                                                                                                      | No                     | -                                                                   |
| Song      | Combination of: different vaccination (at different ages) and VIA/VILI screening (with different frequencies) strategies | No vaccination, no screening                                    | -                                                                | -                                                            | 1-3 * GDP <sup>^</sup> : 50,696 CNY | Vaccination (at age 15) + screening twice in a lifetime (at age 35 and 45) is cost-effective compared to no intervention.<br>Optimal: screening twice in a lifetime*                                                                                     | One-way                | Discounting rate<br>Cost of vaccine<br>Vaccine coverage             |

1  
2  
3  
4  
5  
6  
7  
8  
9  
10  
11  
12  
13  
14  
15  
16  
17  
18  
19  
20  
21  
22  
23  
24  
25  
26  
27  
28  
29  
30  
31  
32  
33  
34  
35  
36  
37  
38  
39  
40  
41  
42  
43  
44  
45  
46  
47

|       |                                                                                      |                              |                                                 |                                            |                                     |                                                                                                                                                                                                                      |                                 |                                                           |
|-------|--------------------------------------------------------------------------------------|------------------------------|-------------------------------------------------|--------------------------------------------|-------------------------------------|----------------------------------------------------------------------------------------------------------------------------------------------------------------------------------------------------------------------|---------------------------------|-----------------------------------------------------------|
| Sun   | Vaccination + Pap test                                                               | Pap test only                | 43,489 CNY/QALY                                 | \$7,272/QALY                               | 1-3 * GDP <sup>^</sup> : 52,000 CNY | Very cost-effective                                                                                                                                                                                                  | One-way                         | Discounting rate<br>Vaccine efficacy<br>Cost of vaccine   |
| Zhang | Vaccination + screening                                                              | Screening only               | Rural: 11,365 CNY/QALY<br>Urban: 6,124 CNY/QALY | Rural: \$2,047/QALY<br>Urban: \$1,103/QALY | 1-3 * GDP <sup>^</sup> : 41,908 CNY | Very cost-effective. Would remain very cost-effective if vaccine cost is below 630 CNY in rural and 750 CNY in urban; and remain cost-effective if below 1,700 CNY in rural and 1,900 CNY in urban                   | One-way, two-way, probabilistic | Cost of vaccine<br>Discounting rate<br>HPV infection rate |
| Zou   | Combination of: vaccination and various screening methods with different frequencies | No vaccination, no screening | -                                               | -                                          | 1-3 * GDP <sup>^</sup> : 10,276 USD | Optimal: vaccination + careHPV screening every 5 years. Strategies that combined vaccination and screening would be more cost-effective than screening alone strategies when the vaccination cost was less than \$50 | One-way, probabilistic          | -                                                         |

**Legend:** \* based on analysis of the reported cost-effectiveness frontier outcomes (rather than what the authors reported); ^ GDP: gross domestic product per capita. ICER: incremental cost-effectiveness ratio; CVG: cost per vaccinated girl; VIA: visual inspection with acetic acid; CC: cervical cancer; CNY: Chinese yuan; QALY: quality-adjusted life year; DALY: disability-adjusted life year.

For peer review only

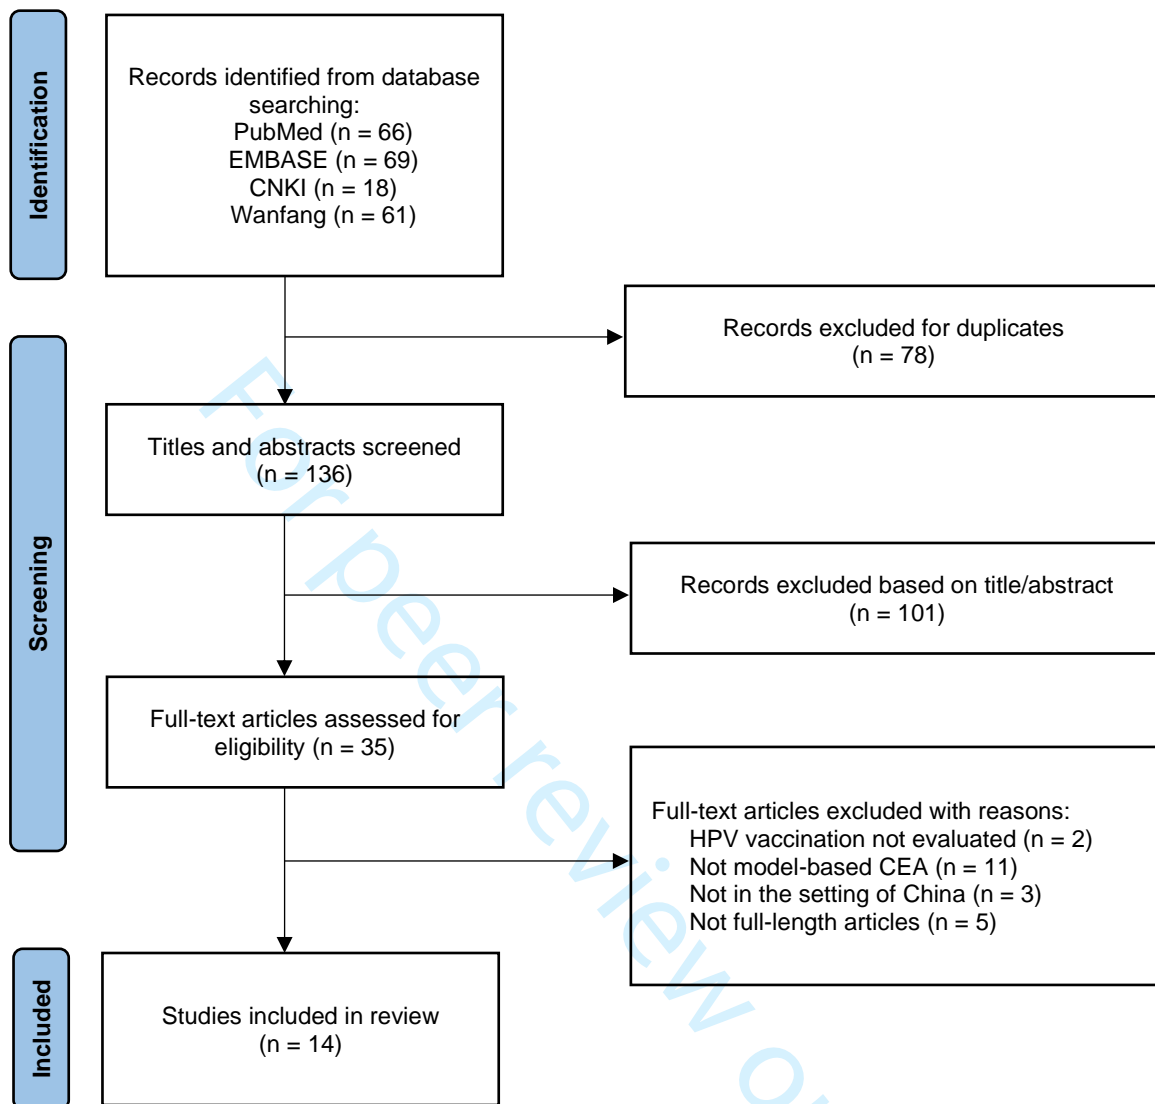

1  
2  
3  
4  
5  
6  
7  
8  
9  
10  
11  
12  
13  
14  
15  
16  
17  
18  
19  
20  
21  
22  
23  
24  
25  
26  
27  
28  
29  
30  
31  
32  
33  
34  
35  
36  
37  
38  
39  
40  
41  
42  
43  
44  
45  
46  
47  
48  
49  
50  
51  
52  
53  
54  
55  
56  
57  
58  
59  
60

**Supplementary Appendix**

For peer review only

Table S1 PRISMA Checklist

| Section / topic                    | #  | Checklist item                                                                                                                                                                                                                                                                                              | Location where item is reported |
|------------------------------------|----|-------------------------------------------------------------------------------------------------------------------------------------------------------------------------------------------------------------------------------------------------------------------------------------------------------------|---------------------------------|
| <b>TITLE</b>                       |    |                                                                                                                                                                                                                                                                                                             |                                 |
| Title                              | 1  | Identify the report as a systematic review, meta-analysis, or both.                                                                                                                                                                                                                                         | Title                           |
| <b>ABSTRACT</b>                    |    |                                                                                                                                                                                                                                                                                                             |                                 |
| Structured summary                 | 2  | Provide a structured summary including, as applicable: background; objectives; data sources; study eligibility criteria, participants, and interventions; study appraisal and synthesis methods; results; limitations; conclusions and implications of key findings; systematic review registration number. | Abstract                        |
| <b>INTRODUCTION</b>                |    |                                                                                                                                                                                                                                                                                                             |                                 |
| Rationale                          | 3  | Describe the rationale for the review in the context of what is already known.                                                                                                                                                                                                                              | Intro, par 4                    |
| Objectives                         | 4  | Provide an explicit statement of questions being addressed with reference to participants, interventions, comparisons, outcomes, and study design (PICOS).                                                                                                                                                  | Intro, par 5                    |
| <b>METHODS</b>                     |    |                                                                                                                                                                                                                                                                                                             |                                 |
| Protocol and registration          | 5  | Indicate if a review protocol exists, if and where it can be accessed (e.g., Web address), and, if available, provide registration information including registration number.                                                                                                                               | Methods, par 1                  |
| Eligibility criteria               | 6  | Specify study characteristics (e.g., PICOS, length of follow-up) and report characteristics (e.g., years considered, language, publication status) used as criteria for eligibility, giving rationale.                                                                                                      | Methods, par 1-2                |
| Information sources                | 7  | Describe all information sources (e.g., databases with dates of coverage, contact with study authors to identify additional studies) in the search and date last searched.                                                                                                                                  | Methods, par 1                  |
| Search                             | 8  | Present full electronic search strategy for at least one database, including any limits used, such that it could be repeated.                                                                                                                                                                               | Table S2-3                      |
| Study selection                    | 9  | State the process for selecting studies (i.e., screening, eligibility, included in systematic review, and, if applicable, included in the meta-analysis).                                                                                                                                                   | Methods, par 2                  |
| Data collection process            | 10 | Describe method of data extraction from reports (e.g., piloted forms, independently, in duplicate) and any processes for obtaining and confirming data from investigators.                                                                                                                                  | Methods, par 3                  |
| Data items                         | 11 | List and define all variables for which data were sought (e.g., PICOS, funding sources) and any assumptions and simplifications made.                                                                                                                                                                       | Methods, par 4                  |
| Risk of bias in individual studies | 12 | Describe methods used for assessing risk of bias of individual studies (including specification of whether this was done at the study or outcome level), and how this information is to be used in any data synthesis.                                                                                      | NA                              |
| Summary measures                   | 13 | State the principal summary measures (e.g., risk ratio, difference in means).                                                                                                                                                                                                                               | Methods, par 3                  |
| Synthesis of results               | 14 | Describe the methods of handling data and combining results of studies, if done, including measures of consistency (e.g., $I^2$ ) for each meta-analysis.                                                                                                                                                   | Methods, par 4                  |
| Risk of bias across studies        | 15 | Specify any assessment of risk of bias that may affect the cumulative evidence (e.g., publication bias, selective reporting within studies).                                                                                                                                                                | NA                              |
| Additional analyses                | 16 | Describe methods of additional analyses (e.g., sensitivity or subgroup analyses, meta-regression), if done, indicating which were pre-specified.                                                                                                                                                            | Methods, par 4                  |
| <b>RESULTS</b>                     |    |                                                                                                                                                                                                                                                                                                             |                                 |
| Study selection                    | 17 | Give numbers of studies screened, assessed for eligibility, and included in the review, with reasons for exclusions at each stage, ideally with a flow diagram.                                                                                                                                             | Figure 1                        |
| Study                              | 18 | For each study, present characteristics for which data were extracted (e.g., study size, PICOS, follow-up period) and provide the citations.                                                                                                                                                                | Results, par 1                  |

|    |                               |    |                                                                                                                                                                                                          |                     |
|----|-------------------------------|----|----------------------------------------------------------------------------------------------------------------------------------------------------------------------------------------------------------|---------------------|
| 1  | characteristics               |    |                                                                                                                                                                                                          |                     |
| 2  | Risk of bias within studies   | 19 | Present data on risk of bias of each study and, if available, any outcome level assessment (see item 20).                                                                                                | NA                  |
| 3  |                               |    |                                                                                                                                                                                                          |                     |
| 4  | Results of individual studies | 20 | For all outcomes considered (benefits or harms), present, for each study: (a) simple summary data for each intervention group (b) effect estimates and confidence intervals, ideally with a forest plot. | Table 3             |
| 5  |                               |    |                                                                                                                                                                                                          |                     |
| 6  | Synthesis of results          | 21 | Present results of each meta-analysis done, including confidence intervals and measures of consistency.                                                                                                  | NA                  |
| 7  | Risk of bias across studies   | 22 | Present results of any assessment of risk of bias across studies.                                                                                                                                        | NA                  |
| 8  |                               |    |                                                                                                                                                                                                          |                     |
| 9  | Additional analysis           | 23 | Give results of additional analyses, if done (e.g., sensitivity or subgroup analyses, meta-regression)                                                                                                   | Results, par 5      |
| 10 |                               |    |                                                                                                                                                                                                          |                     |
| 11 | <b>DISCUSSION</b>             |    |                                                                                                                                                                                                          |                     |
| 12 | Summary of evidence           | 24 | Summarize the main findings including the strength of evidence for each main outcome; consider their relevance to key groups (e.g., healthcare providers, users, and policy makers).                     | Discussion, par 1-2 |
| 13 |                               |    |                                                                                                                                                                                                          |                     |
| 14 | Limitations                   | 25 | Discuss limitations at study and outcome level (e.g., risk of bias), and at review-level (e.g., incomplete retrieval of identified research, reporting bias).                                            | Discussion, par 5   |
| 15 |                               |    |                                                                                                                                                                                                          |                     |
| 16 | Conclusions                   | 26 | Provide a general interpretation of the results in the context of other evidence, and implications for future research.                                                                                  | Discussion, par 3-4 |
| 17 |                               |    |                                                                                                                                                                                                          |                     |
| 18 | <b>FUNDING</b>                |    |                                                                                                                                                                                                          |                     |
| 19 | Funding                       | 27 | Describe sources of funding for the systematic review and other support (e.g., supply of data); role of funders for the systematic review.                                                               | Acknowledgement     |

20 Intro: introduction; par: paragraph; NA: not applicable

**Table S2 Search strategy and key terms in PubMed and EMBASE databases**

|           | <b>AND</b>           | <b>AND</b>  | <b>AND</b>          | <b>AND</b> |
|-----------|----------------------|-------------|---------------------|------------|
| <b>OR</b> | Human papillomavirus | Vaccine     | Cost-effectiveness  | China      |
| <b>OR</b> | HPV                  | Vaccination | Cost-benefit        |            |
| <b>OR</b> | Cervical cancer      | Immune*     | Cost-utility        |            |
| <b>OR</b> |                      |             | Cost-effective      |            |
| <b>OR</b> |                      |             | Model*              |            |
| <b>OR</b> |                      |             | Economic evaluation |            |
| <b>OR</b> |                      |             | Pharmacoeconomic*   |            |

The search was conducted by title/abstract.

**Table S3 Search strategy and key terms in China National Knowledge Infrastructure and Wanfang databases**

|    | AND    | AND | AND     | AND |
|----|--------|-----|---------|-----|
| OR | 人乳头瘤病毒 | 疫苗  | 成本效用    | 中国  |
| OR | HPV    | 免疫  | 成本收益    |     |
| OR | 宫颈癌    |     | 成本效益    |     |
| OR |        |     | 成本效果    |     |
| OR |        |     | 模型分析    |     |
| OR |        |     | 经济学评价   |     |
| OR |        |     | 药物经济学评价 |     |

The search was conducted by title/abstract



**Table S4 Quality assessment of model reporting using CHEC-list**

| Checklist item                                                                                                      | Canfell | Choi | Jiang | Levin | Liu | Luo P | Luo Y | Ma  | Mo   | Qie | Song | Sun | Zhang | Zou |
|---------------------------------------------------------------------------------------------------------------------|---------|------|-------|-------|-----|-------|-------|-----|------|-----|------|-----|-------|-----|
| 1. Is the study population clearly described?                                                                       | 1       | 1    | 1     | 1     | 1   | 1     | 1     | 1   | 1    | 1   | 0    | 1   | 1     | 1   |
| 2. Are competing alternatives clearly described?                                                                    | 1       | 1    | 1     | 1     | 1   | 1     | 1     | 1   | 1    | 1   | 1    | 1   | 1     | 1   |
| 3. Is a well-defined research question posed in answerable form?                                                    | 1       | 1    | 1     | 1     | 1   | 1     | 1     | 1   | 1    | 1   | 1    | 1   | 1     | 1   |
| 4. Is the economic study design appropriate to the stated objective?                                                | 1       | 1    | 1     | 1     | 1   | 1     | 1     | 1   | 1    | 1   | 1    | 1   | 1     | 1   |
| 5. Is the chosen time horizon appropriate in order to include relevant costs and consequences?                      | 1       | 1    | 1     | 1     | 1   | 0     | 1     | 1   | 1    | 0   | 1    | 1   | 1     | 1   |
| 6. Is the actual perspective chosen appropriate?                                                                    | 1       | 0    | 1     | 0     | 1   | 0     | 1     | 0   | 1    | 0   | 1    | 1   | 1     | 1   |
| 7. Are all important and relevant costs for each alternative identified?                                            | 1       | 1    | 1     | 1     | 1   | 1     | 1     | 1   | 1    | 1   | 1    | 1   | 1     | 1   |
| 8. Are all costs measured appropriately in physical units?                                                          | 1       | 1    | 1     | 1     | 1   | 1     | 1     | 1   | 1    | 0   | 1    | 1   | 1     | 1   |
| 9. Are costs valued appropriately?                                                                                  | 1       | 0    | 1     | 1     | 0   | 0     | 0     | 1   | 1    | 0   | 0    | 0   | 1     | 1   |
| 10. Are all important and relevant outcomes for each alternative identified?                                        | 1       | 1    | 1     | 1     | 1   | 1     | 1     | 1   | 1    | 1   | 1    | 1   | 1     | 1   |
| 11. Are all outcomes measured appropriately?                                                                        | 1       | 1    | 1     | 1     | 1   | 1     | 1     | 1   | 1    | 1   | 1    | 1   | 1     | 1   |
| 12. Are outcomes valued appropriately?                                                                              | N/A     | 1    | 0     | N/A   | 1   | 0     | 1     | 1   | 1    | 0   | N/A  | 1   | 1     | 1   |
| 13. Is an incremental analysis of costs and outcomes of alternatives performed?                                     | 1       | 1    | 1     | N/A   | 1   | 1     | 1     | 1   | 1    | 1   | 1    | 1   | 1     | 1   |
| 14. Are all future costs and outcomes discounted appropriately?                                                     | 1       | 1    | 1     | 0     | 1   | 1     | 1     | 1   | 1    | 1   | 1    | 1   | 1     | 1   |
| 15. Are all important variables, whose values are uncertain, appropriately subjected to sensitivity analysis?       | 1       | 1    | 1     | 1     | 0   | 1     | 1     | 1   | 1    | 0   | 1    | 1   | 1     | 1   |
| 16. Do the conclusions follow from the data reported?                                                               | 1       | 1    | 1     | 1     | 1   | 1     | 1     | 1   | 1    | 1   | 1    | 1   | 1     | 1   |
| 17. Does the study discuss the generalizability of the results to other settings and patient/client groups?         | 1       | 1    | 0     | 1     | 1   | 0     | 1     | 0   | 1    | 0   | 0    | 0   | 1     | 1   |
| 18. Does the article indicate that there is no potential conflict of interest of study researcher(s) and funder(s)? | 1       | 1    | 1     | 1     | 1   | 0     | 1     | 1   | 1    | 0   | 1    | 0   | 1     | 1   |
| 19. Are ethical and distributional issues discussed appropriately?                                                  | 1       | 0    | 0     | 1     | 1   | 0     | 0     | 1   | 1    | 0   | 0    | 0   | 1     | 0   |
| Total % of Yes                                                                                                      | 100%    | 84%  | 84%   | 88%   | 89% | 63%   | 89%   | 89% | 100% | 53% | 78%  | 79% | 100%  | 95% |

“1”: meets the assessment criteria; “0”: does not meet the assessment criteria; N/A: not applicable.

## PRISMA Checklist

| Section / topic                    | #  | Checklist item                                                                                                                                                                                                                                                                                              | Location where item is reported |
|------------------------------------|----|-------------------------------------------------------------------------------------------------------------------------------------------------------------------------------------------------------------------------------------------------------------------------------------------------------------|---------------------------------|
| <b>TITLE</b>                       |    |                                                                                                                                                                                                                                                                                                             |                                 |
| Title                              | 1  | Identify the report as a systematic review, meta-analysis, or both.                                                                                                                                                                                                                                         | Title                           |
| <b>ABSTRACT</b>                    |    |                                                                                                                                                                                                                                                                                                             |                                 |
| Structured summary                 | 2  | Provide a structured summary including, as applicable: background; objectives; data sources; study eligibility criteria, participants, and interventions; study appraisal and synthesis methods; results; limitations; conclusions and implications of key findings; systematic review registration number. | Abstract                        |
| <b>INTRODUCTION</b>                |    |                                                                                                                                                                                                                                                                                                             |                                 |
| Rationale                          | 3  | Describe the rationale for the review in the context of what is already known.                                                                                                                                                                                                                              | Intro, par 4                    |
| Objectives                         | 4  | Provide an explicit statement of questions being addressed with reference to participants, interventions, comparisons, outcomes, and study design (PICOS).                                                                                                                                                  | Intro, par 5                    |
| <b>METHODS</b>                     |    |                                                                                                                                                                                                                                                                                                             |                                 |
| Protocol and registration          | 5  | Indicate if a review protocol exists, if and where it can be accessed (e.g., Web address), and, if available, provide registration information including registration number.                                                                                                                               | Methods, par 1                  |
| Eligibility criteria               | 6  | Specify study characteristics (e.g., PICOS, length of follow-up) and report characteristics (e.g., years considered, language, publication status) used as criteria for eligibility, giving rationale.                                                                                                      | Methods, par 1-2                |
| Information sources                | 7  | Describe all information sources (e.g., databases with dates of coverage, contact with study authors to identify additional studies) in the search and date last searched.                                                                                                                                  | Methods, par 1                  |
| Search                             | 8  | Present full electronic search strategy for at least one database, including any limits used, such that it could be repeated.                                                                                                                                                                               | Table S2-3                      |
| Study selection                    | 9  | State the process for selecting studies (i.e., screening, eligibility, included in systematic review, and, if applicable, included in the meta-analysis).                                                                                                                                                   | Methods, par 2                  |
| Data collection process            | 10 | Describe method of data extraction from reports (e.g., piloted forms, independently, in duplicate) and any processes for obtaining and confirming data from investigators.                                                                                                                                  | Methods, par 3                  |
| Data items                         | 11 | List and define all variables for which data were sought (e.g., PICOS, funding sources) and any assumptions and simplifications made.                                                                                                                                                                       | Methods, par 4                  |
| Risk of bias in individual studies | 12 | Describe methods used for assessing risk of bias of individual studies (including specification of whether this was done at the study or outcome level), and how this information is to be used in any data synthesis.                                                                                      | NA                              |
| Summary measures                   | 13 | State the principal summary measures (e.g., risk ratio, difference in means).                                                                                                                                                                                                                               | Methods, par 3                  |
| Synthesis of results               | 14 | Describe the methods of handling data and combining results of studies, if done, including measures of consistency (e.g., $I^2$ ) for each meta-analysis.                                                                                                                                                   | Methods, par 4                  |
| Risk of bias across studies        | 15 | Specify any assessment of risk of bias that may affect the cumulative evidence (e.g., publication bias, selective reporting within studies).                                                                                                                                                                | NA                              |
| Additional analyses                | 16 | Describe methods of additional analyses (e.g., sensitivity or subgroup analyses, meta-regression), if done, indicating which were pre-specified.                                                                                                                                                            | Methods, par 4                  |
| <b>RESULTS</b>                     |    |                                                                                                                                                                                                                                                                                                             |                                 |
| Study selection                    | 17 | Give numbers of studies screened, assessed for eligibility, and included in the review, with reasons for exclusions at each stage, ideally with a flow diagram.                                                                                                                                             | Figure 1                        |
| Study                              | 18 | For each study, present characteristics for which data were extracted (e.g., study size, PICOS, follow-up period) and provide the citations.                                                                                                                                                                | Results, par 1                  |

|                               |    |                                                                                                                                                                                                          |                     |
|-------------------------------|----|----------------------------------------------------------------------------------------------------------------------------------------------------------------------------------------------------------|---------------------|
| characteristics               |    |                                                                                                                                                                                                          |                     |
| Risk of bias within studies   | 19 | Present data on risk of bias of each study and, if available, any outcome level assessment (see item 20).                                                                                                | NA                  |
| Results of individual studies | 20 | For all outcomes considered (benefits or harms), present, for each study: (a) simple summary data for each intervention group (b) effect estimates and confidence intervals, ideally with a forest plot. | Table 3             |
| Synthesis of results          | 21 | Present results of each meta-analysis done, including confidence intervals and measures of consistency.                                                                                                  | NA                  |
| Risk of bias across studies   | 22 | Present results of any assessment of risk of bias across studies.                                                                                                                                        | NA                  |
| Additional analysis           | 23 | Give results of additional analyses, if done (e.g., sensitivity or subgroup analyses, meta-regression)                                                                                                   | Results, par 5      |
| <b>DISCUSSION</b>             |    |                                                                                                                                                                                                          |                     |
| Summary of evidence           | 24 | Summarize the main findings including the strength of evidence for each main outcome; consider their relevance to key groups (e.g., healthcare providers, users, and policy makers).                     | Discussion, par 1-2 |
| Limitations                   | 25 | Discuss limitations at study and outcome level (e.g., risk of bias), and at review-level (e.g., incomplete retrieval of identified research, reporting bias).                                            | Discussion, par 5   |
| Conclusions                   | 26 | Provide a general interpretation of the results in the context of other evidence, and implications for future research.                                                                                  | Discussion, par 3-4 |
| <b>FUNDING</b>                |    |                                                                                                                                                                                                          |                     |
| Funding                       | 27 | Describe sources of funding for the systematic review and other support (e.g., supply of data); role of funders for the systematic review.                                                               | Acknowledgement     |

Intro: introduction; par: paragraph; NA: not applicable
